# Supplementary material for: Genomic Structure and Variation of Nuclear Factor (Erythroid-Derived 2)-Like 2
Source: Hindawi journal article supplement (doi:10.1155/2013/286524), 2013-01-01
Supplement: f1 [file 286524.f1.pdf]

|    | A                                                                      | B                                     | C                                  | D               | E              | F                                         | G                      |
|----|------------------------------------------------------------------------|---------------------------------------|------------------------------------|-----------------|----------------|-------------------------------------------|------------------------|
| 1  | <b>Supplementary Table S1. Genetic mutations in human <i>NRF2</i>.</b> |                                       |                                    |                 |                |                                           |                        |
| 2  | <b>ID</b>                                                              | <b>Map on chromosome 2*/HGVS Name</b> | <b>Position at mRNA*/HGVS Name</b> | <b>Regions</b>  | <b>Summary</b> | <b>Minor Allele Frequency (MAF)/Count</b> | <b>MAF sources</b>     |
| 3  | rs16865105                                                             | g.178136629A>C                        | -                                  | 5'flanking      | -6770          | C=0.1928/421                              | 1000 Genomes           |
| 4  | rs7557529                                                              | g.178135097C>T                        | -                                  | 5'flanking      | -5238          | C=0.718/252                               | PubMed                 |
| 5  | rs2886162                                                              | g.178133165A>G                        | -                                  | 5'flanking      | -3306          | T=0.324                                   | PubMed                 |
| 6  | rs6750320                                                              | g.178131796C>T                        | c.-555-1937G>A                     | 5'flanking      | -1937          | T=0.0302/66                               | 1000 Genomes           |
| 7  | rs181162518                                                            | g.178131774T>C                        | c.-555-1915A>G                     | 5'flanking      | -1915          | C=0.0005/1                                | 1000 Genomes           |
| 8  | rs190044775                                                            | g.178131746C>T                        | c.-555-1887G>A                     | 5'flanking      | -1887          | T=0.0005/1                                | 1000 Genomes           |
| 9  | rs185117338                                                            | g.178131704A>G                        | c.-555-1845T>C                     | 5'flanking      | -1845          | G=0.0005/1                                | 1000 Genomes           |
| 10 | rs149947189                                                            | g.178131697C>T                        | c.-555-1838G>A                     | 5'flanking      | -1838          | T=0.0009/2                                | 1000 Genomes           |
| 11 | rs139771244                                                            | g.178131625A>G                        | c.-555-1766T>C                     | 5'flanking      | -1766          | G=0.0009/2                                | 1000 Genomes           |
| 12 | rs6747203                                                              | g.178131604C>G                        | c.-555-1745G>C                     | 5'flanking      | -1745          | G=0.006/13                                | 1000 Genomes           |
| 13 | rs193101749                                                            | g.178131504T>C                        | c.-555-1645A>G                     | 5'flanking      | -1645          | C=0.0046/10                               | 1000 Genomes           |
| 14 | rs190630762                                                            | g.178131495G>C                        | c.-555-1636C>G                     | 5'flanking      | -1636          | C=0.0009/2                                | 1000 Genomes           |
| 15 | rs183764402                                                            | g.178131366C>A                        | c.-555-1507G>T                     | 5'flanking      | -1507          | A=0.0005/1                                | 1000 Genomes           |
| 16 | rs191222964                                                            | g.178131211G>A                        | c.-555-1352C>T                     | 5'flanking      | -1352          | A=0.0009/2                                | 1000 Genomes           |
| 17 | rs187137522                                                            | g.178131165T>G                        | c.-555-1306A>C                     | 5'flanking      | -1306          | G=0.0009/2                                | 1000 Genomes           |
| 18 | rs182620359                                                            | g.178131158A>G                        | c.-555-1299T>C                     | 5'flanking      | -1299          | G=0.0005/1                                | 1000 Genomes           |
| 19 | rs4893819 (rs61433302)                                                 | g.178131134C>T                        | c.-555-1275G>A                     | 5'flanking      | -1275          | C=0.4263/931                              | 1000 Genomes           |
| 20 | rs191547130                                                            | g.178131101T>C                        | c.-555-1158G>A                     | 5'flanking      | -1158          | T=0.0005/1                                | 1000 Genomes           |
| 21 | rs188422217                                                            | g.178131003A>G                        | c.-555-1144T>C                     | 5'flanking      | -1144          | G=0.0014/3                                | 1000 Genomes           |
| 22 | rs143047764                                                            | g.178130865A>G                        | c.-555-1006T>C                     | 5'flanking      | -1006          | G=0.0069/15                               | 1000 Genomes           |
| 23 | rs74432849                                                             | g.178130766C>A                        | c.-555-907G>T                      | 5'flanking      | -907           | na                                        |                        |
| 24 | rs11679252                                                             | g.178130691C>G                        | c.-555-832G>C                      | 5'flanking      | -832           | na                                        |                        |
| 25 | rs12993217                                                             | g.178130516A>G                        | c.-555-657T>C                      | 5'flanking      | -657           | na                                        |                        |
| 26 | rs115644826                                                            | g.178130442T>A                        | c.-555-583A>T                      | 5'flanking      | -583           | A=0.0151/33                               | 1000 Genomes           |
| 27 | rs140803524                                                            | g.178130431G>A                        | c.-555-572C>T                      | 5'flanking      | -572           | A=0.0046/10                               | 1000 Genomes           |
| 28 | rs77684420                                                             | g.178130427T>C                        | c.-555-568A>G                      | 5'flanking      | -568           | C=0.0339/74                               | 1000 Genomes<br>PubMed |
| 29 | rs183651094                                                            | g.178130336A>T                        | c.-555-477T>A                      | 5'flanking      | -477           | T=0.0018/4                                | 1000 Genomes           |
| 30 | rs35652124§ (rs57695243)                                               | g.178130073T>C                        | c.-555-214A>G                      | 5'flanking      | -214           | C=0.3512/767<br>various                   | 1000 Genomes<br>PubMed |
| 31 | rs6706649§                                                             | g.178130071C>T                        | c.-555-212G>A                      | 5'flanking      | -212           | T=0.078/170<br>various                    | 1000 Genomes<br>PubMed |
| 32 | rs150648896                                                            | g.178130047C>G                        | c.-555-188G>C                      | 5'flanking      | -188           | G=0.0023/5                                | 1000 Genomes<br>PubMed |
| 33 | rs6721961§ (rs117801448)                                               | g.178130037T>C, T>G                   | c.-555-178A>C, A>G                 | 5'flanking      | -178           | T=0.150/328<br>various                    | 1000 Genomes<br>PubMed |
| 34 | rs201345604                                                            | g.178129924_178129925insG             | c.-555-66_-555-65insC              | 5'flanking      | -66_-65        | G=0.0179/39                               | 1000 Genomes           |
| 35 | rs200432479                                                            | g.178129741_178129742delAA            | c.-438_-437delTT                   | exon 1 (UTR-5') | mRNA 118_119   | -=0.0037/8<br>=0.53                       | 1000 Genomes<br>PubMed |
| 36 | rs75485459                                                             | g.178129608C>A                        | c.-304G>T                          | exon 1 (UTR-5') | mRNA 252       | na                                        |                        |
| 37 | rs192086766                                                            | g.178129466C>T                        | c.-162G>A                          | exon 1 (UTR-5') | mRNA 394       | T=0.022/48<br>C=0.145/318                 | 1000 Genomes<br>PubMed |
| 38 | -                                                                      | g.178129442G>A                        | c.-138C>T                          | exon 1 (UTR-5') | mRNA 418       | A=0.012                                   | PubMed                 |
| 39 | rs71668246                                                             | g.178129400delG                       | c.-96delC                          | exon 1 (UTR-5') | mRNA 460       | na                                        |                        |
| 40 | rs187291840                                                            | g.178129399C>T                        | c.-95G>A                           | exon 1 (UTR-5') | mRNA 461       | T=0.0549/120                              | 1000 Genomes           |
| 41 | rs143406266                                                            | g.178129391_178129393delIGCC          | c.-89_-87delIGCC                   | exon 1 (UTR-5') | mRNA 467_469   | -=0.644/282<br>=0.589                     | PubMed                 |
| 42 | rs112882959                                                            | g.178129147T>C                        | c.45+113A>G                        | intron 1        |                | na                                        |                        |
| 43 | rs4319966                                                              | g.178129002C>A                        | c.45+258G>T                        | intron 1        |                | na                                        |                        |
| 44 | rs112246802                                                            | g.178128828A>G                        | c.45+432T>C                        | intron 1        |                | na                                        |                        |
| 45 | rs17524059                                                             | g.178128693A>C                        | c.45+567T>G                        | intron 1        |                | C=0.2079/454                              | 1000 Genomes           |
| 46 | rs111925788                                                            | g.178128676G>A                        | c.45+584C>T                        | intron 1        |                | na                                        |                        |
| 47 | rs112135794                                                            | g.178128624G>C                        | c.45+636C>G                        | intron 1        |                | na                                        |                        |
| 48 | rs113034282                                                            | g.178128540G>C                        | c.45+720C>G                        | intron 1        |                | na                                        |                        |
| 49 | rs17551500                                                             | g.178128448C>A                        | c.45+812G>T                        | intron 1        |                | A=0.0114/25                               | 1000 Genomes           |
| 50 | rs17522805                                                             | g.178128362 C>G                       | c.45+898G>C                        | intron 1        |                | na                                        |                        |
| 51 | rs182395677                                                            | g.178128277G>T                        | c.45+983C>A                        | intron 1        |                | T=0.0023/5                                | 1000 Genomes           |
| 52 | rs201289976                                                            | g.178128177T>C                        | c.45+1083A>G                       | intron 1        |                | na                                        |                        |
| 53 | rs189933272                                                            | g.178128120G>C                        | c.45+1140C>G                       | intron 1        |                | C=0.0018/4                                | 1000 Genomes           |
| 54 | rs185170228                                                            | g.178128028G>A                        | c.45+1232C>T                       | intron 1        |                | A=0.0014/3                                | 1000 Genomes           |
| 55 | rs181303187                                                            | g.178128004T>G                        | c.45+1256A>C                       | intron 1        |                | G=0.0009/2                                | 1000 Genomes           |
| 56 | rs7564947 (rs58679638)                                                 | g.178128003T>C                        | c.45+1257A>G                       | intron 1        |                | C=0.2312/505                              | 1000 Genomes           |
| 57 | rs2886161§                                                             | g.178127839T>C                        | c.45+1421A>G                       | intron 1        |                | C=0.350/765<br>T=0.878/309                | 1000 Genomes<br>PubMed |
| 58 | rs73979903                                                             | g.178127826C>T                        | c.45+1434G>A                       | intron 1        |                | T=0.0256/56                               | 1000 Genomes           |
| 59 | rs141904435                                                            | g.178127777C>T                        | c.45+1483G>A                       | intron 1        |                | T=0.0005/1                                | 1000 Genomes           |
| 60 | rs76611439                                                             | g.178127494G>A                        | c.45+1766C>T                       | intron 1        |                | na                                        |                        |
| 61 | rs201655804                                                            | g.178127472_178127473delAT            | c.45+1787_45+1788delAT             | intron 1        |                | -=0.0293/64                               | 1000 Genomes           |
| 62 | rs72042416                                                             | g.178127468delA                       | c.45+1792delT                      | intron 1        |                | na                                        |                        |
| 63 | rs138113967                                                            | g.178127468_178127470delAAT           | c.45+1790_45+1792delATT            | intron 1        |                | na                                        |                        |
| 64 | rs189669687                                                            | g.178127289A>C                        | c.45+1971T>G                       | intron 1        |                | C=0.0005/1                                | 1000 Genomes           |
| 65 | rs186972464                                                            | g.178127263T>C                        | c.45+1997A>G                       | intron 1        |                | C=0.0009/2                                | 1000 Genomes           |
| 66 | rs116657784                                                            | g.178127172A>G                        | c.45+2088T>C                       | intron 1        |                | G=0.0023/5                                | 1000 Genomes           |
| 67 | rs34009885                                                             | g.178127089A>G                        | c.45+2171T>C                       | intron 1        |                | G=0.3516/768                              | 1000 Genomes           |

|     | A                                                 | B                                  | C                              | D        | E       | F                                  | G                      |
|-----|---------------------------------------------------|------------------------------------|--------------------------------|----------|---------|------------------------------------|------------------------|
| 2   | ID                                                | Map on chromosome 2*/HGVS Name     | Position at mRNA*/HGVS Name    | Regions  | Summary | Minor Allele Frequency (MAF)/Count | MAF sources            |
| 68  | rs148128831                                       | g.178127066G>C                     | c.45+2194C>G                   | intron 1 |         | C=0.0005/1                         | 1000 Genomes           |
| 69  | rs34551701 (rs58170107)                           | g.178127040A>C                     | c.45+2220T>G                   | intron 1 |         | C=0.2047/447                       | 1000 Genomes           |
| 70  | rs143764709                                       | g.178127034T>A                     | c.45+2226A>T                   | intron 1 |         | A=0.0014/3                         | 1000 Genomes           |
| 71  | rs6709422                                         | g.178126817T>A                     | c.45+2443A>T                   | intron 1 |         | na                                 |                        |
| 72  | rs181805076                                       | g.178126687T>C                     | c.45+2573A>G                   | intron 1 |         | C=0.0005/1                         | 1000 Genomes           |
| 73  | rs80141132                                        | g.178126676A>G                     | c.45+2584T>C                   | intron 1 |         | G=0/0                              | 1000 Genomes           |
| 74  | rs199784732                                       | g.178126608_178126609insA          | c.45+2651_45+2652insT          | intron 1 |         | A=0.0092/20                        | 1000 Genomes           |
| 75  | rs2364723§ (rs56505635,rs5808331)                 | g.178126546G>C                     | c.45+2714C>G                   | intron 1 |         | C=0.352/768<br>C=0.525             | 1000 Genomes<br>PubMed |
| 76  | rs80018561                                        | g.178126316C>A                     | c.45+2944G>T                   | intron 1 |         | A=0.0192/42                        | 1000 Genomes           |
| 77  | rs142240496                                       | g.178126277T>C                     | c.45+2983A>G                   | intron 1 |         | C=0.0005/1                         | 1000 Genomes           |
| 78  | rs190525518                                       | g.178126248C>A                     | c.45+3012G>T                   | intron 1 |         | A=0.0018/4                         | 1000 Genomes           |
| 79  | rs56718550                                        | g.178126127C>T                     | c.45+3133G>A                   | intron 1 |         | T=0.1548/336                       | 1000 Genomes           |
| 80  | rs145225605                                       | g.178126116G>A                     | c.45+3144C>T                   | intron 1 |         | A=0.0005/1                         | 1000 Genomes           |
| 81  | rs77992884                                        | g.178125993G>A                     | c.45+3267C>T                   | intron 1 |         | A=0.0252/55                        | 1000 Genomes           |
| 82  | rs140249633                                       | g.178125952C>A                     | c.45+3308G>T                   | intron 1 |         | A=0.0032/7                         | 1000 Genomes           |
| 83  | rs7596275                                         | g.178125914C>A                     | c.45+3346G>T                   | intron 1 |         | na                                 |                        |
| 84  | rs59040355                                        | g.178125913_178125914insAA, insAAA | c.45+3346_45+3347insTT, insTTT | intron 1 |         | na                                 |                        |
| 85  | rs71956253<br>(rs71992218,rs72324788,rs138134697) | g.178125899_178125900insAA, insAAA | 45+3360_45+3361insTT, insTTT   | intron 1 |         | na                                 |                        |
| 86  | rs71410739                                        | g.178125898_178125899insAA         | c.45+3361_45+3362insTT         | intron 1 |         | na                                 |                        |
| 87  | rs58493972                                        | g.178125722G>A                     | c.45+3538C>T                   | intron 1 |         | A=0.1923/420                       | 1000 Genomes           |
| 88  | rs184632003                                       | g.178125656T>G                     | c.45+3604A>C                   | intron 1 |         | G=0.006/13                         | 1000 Genomes           |
| 89  | rs7593592                                         | g.178125623G>A                     | c.45+3639C>T                   | intron 1 |         | A=0.0169/37                        | 1000 Genomes           |
| 90  | rs67060362 (rs67060363)                           | g.178125538_178125539insAACA       | c.45+3721_45+3722insTGTT       | intron 1 |         | na                                 |                        |
| 91  | rs56339224 (rs58213900)                           | g.178125537_178125538unsAACA       | c.45+3722_45+3723insTGTT       | intron 1 |         | na                                 |                        |
| 92  | rs66614960 (rs66614961)                           | g.178125536_178125537insCAAA       | c.45+3723_45+3724insTTTG       | intron 1 |         | na                                 |                        |
| 93  | rs147426191                                       | g.178125535_178125536insCAAA       | c.45+3724_45+3725insTTTG       | intron 1 |         | na                                 |                        |
| 94  | rs76201577                                        | g.178125532_178125533insGGC        | c.45+3727_45+3728insGCC        | intron 1 |         | na                                 |                        |
| 95  | rs55940464 (suspected)                            | g.178125528A>G                     | c.45+3732T>C                   | intron 1 |         | na                                 |                        |
| 96  | rs192396116                                       | g.178125302G>A                     | c.45+3958C>T                   | intron 1 |         | A=0.0005/1<br>A=0.452/988          | 1000 Genomes<br>PubMed |
| 97  | rs188222526                                       | g.178125281T>C                     | c.45+3979A>G                   | intron 1 |         | C=0.0009/2                         | 1000 Genomes           |
| 98  | rs116709891                                       | g.178125225T>C                     | c.45+4035A>G                   | intron 1 |         | C=0.0018/4                         | 1000 Genomes           |
| 99  | rs34468415                                        | g.178125142A>G                     | c.45+4118T>C                   | intron 1 |         | G=0.2166/473                       | 1000 Genomes           |
| 100 | rs140782632                                       | g.178125103A>G                     | c.45+4157T>C                   | intron 1 |         | G=0.0073/16                        | 1000 Genomes           |
| 101 | rs183492729                                       | g.178124868T>C                     | c.45+4392A>G                   | intron 1 |         | C=0.0037/8                         | 1000 Genomes           |
| 102 | rs192793174                                       | g.178124819C>T                     | c.45+4441G>A                   | intron 1 |         | T=0.0005/1                         | 1000 Genomes           |
| 103 | rs2364722 (rs59229886)                            | g.178124787 A>G                    | c.45+4473T>C                   | intron 1 |         | G=0.3516/768                       | 1000 Genomes<br>PubMed |
| 104 | rs79632183                                        | g.178124660A>C                     | c.46+4600T>G                   | intron 1 |         | na                                 |                        |
| 105 | rs78764917                                        | g.178124659C>A                     | c.45+4601G>T                   | intron 1 |         | na                                 |                        |
| 106 | rs188213163                                       | g.178124639G>A                     | c.45+4621C>T                   | intron 1 |         | A=0.0069/15                        | 1000 Genomes           |
| 107 | rs150874658                                       | g.178124638C>T                     | c.45+4622G>A                   | intron 1 |         | T=0.0078/17                        | 1000 Genomes           |
| 108 | rs183571722                                       | g.178124515C>A                     | c.45+4745G>T                   | intron 1 |         | A=0.0009/2                         | 1000 Genomes           |
| 109 | rs112899296                                       | g.178124508A>G                     | c.45+4752T>C                   | intron 1 |         | G=0.0073/16                        | 1000 Genomes           |
| 110 | rs12185576                                        | g.178124386C>T                     | c.45+4874G>A                   | intron 1 |         | T=0.3526/770                       | 1000 Genomes           |
| 111 | rs200287267                                       | g.178124075delG                    | c.45+5185delC                  | intron 1 |         | -=0.0069/15                        | 1000 Genomes           |
| 112 | rs200672646                                       | g.17812403delA                     | c.45+5226delT                  | intron 1 |         | na                                 |                        |
| 113 | rs112167582                                       | g.178124029C>A                     | c.45+5237G>T                   | intron 1 |         | A=0.0275/60                        | 1000 Genomes           |
| 114 | rs57136150                                        | g.178123987A>G                     | c.45+5273T>C                   | intron 1 |         | na                                 |                        |
| 115 | rs193061352                                       | g.178123955G>A                     | c.45+5305C>T                   | intron 1 |         | A=0.0005/1<br>T=0.077/168          | 1000 Genomes<br>PubMed |
| 116 | rs141429955                                       | g.178123896G>A                     | c.45+5364C>T                   | intron 1 |         | A=0.0082/18                        | 1000 Genomes           |
| 117 | rs147860035                                       | g.178123867T>C                     | c.45+5393A>G                   | intron 1 |         | C=0.0087/19                        | 1000 Genomes           |
| 118 | rs111507120                                       | g.178123805A>C                     | c.45+5455T>G                   | intron 1 |         | na                                 |                        |
| 119 | rs2364721                                         | g.178123692T>C                     | c.45+5568A>G                   | intron 1 |         | C=0.0252/55                        | 1000 Genomes           |
| 120 | rs112641523                                       | g.178123579C>T                     | c.45+5681G>A                   | intron 1 |         | na                                 |                        |
| 121 | rs144599315                                       | g.178123454T>A                     | c.45+5806A>T                   | intron 1 |         | A=0.0018/4                         | 1000 Genomes           |
| 122 | rs115730108                                       | g.178123384T>C                     | c.45+5876A>G                   | intron 1 |         | C=0.0069/15                        | 1000 Genomes           |
| 123 | rs115138774                                       | g.178123361A>G                     | c.45+5899T>C                   | intron 1 |         | G=0.0009/2                         | 1000 Genomes           |
| 124 | rs187416832                                       | g.178123177G>A                     | c.45+6083C>T                   | intron 1 |         | A=0.0014/3                         | 1000 Genomes           |
| 125 | rs72946143                                        | g.178123129T>C                     | c.45+6131A>G                   | intron 1 |         | C=0.027/59                         | 1000 Genomes           |
| 126 | rs183440350                                       | g.178123090T>G                     | c.45+6170A>C                   | intron 1 |         | G=0.0069/15                        | 1000 Genomes           |
| 127 | rs190871210                                       | g.178123071T>A                     | c.45+6189A>T                   | intron 1 |         | A=0.0005/1                         | 1000 Genomes           |
| 128 | rs140687001                                       | g.178123011T>C                     | c.45+6249A>G                   | intron 1 |         | C=0.0005/1                         | 1000 Genomes           |
| 129 | rs144243231                                       | g.178123010A>G                     | c.45+6250T>C                   | intron 1 |         | G=0.0005/1                         | 1000 Genomes           |
| 130 | rs112008835                                       | g.178123002G>A                     | c.45+6258C>T                   | intron 1 |         | A=0.0023/5                         | 1000 Genomes           |
| 131 | rs139330296                                       | g.178122955A>G                     | c.45+6305T>C                   | intron 1 |         | G=0.0009/2                         | 1000 Genomes           |
| 132 | rs35959128                                        | g.178122742G>T                     | c.45+6518C>A                   | intron 1 |         | na                                 |                        |
| 133 | rs62173695                                        | g.178122727G>A                     | c.45+6533C>T                   | intron 1 |         | A=0.217/474                        | 1000 Genomes           |
| 134 | rs142177417                                       | g.178122717C>A                     | c.45+6543G>T                   | intron 1 |         | A=0.0014/3                         | 1000 Genomes           |

|     | A                                   | B                                | C                            | D        | E       | F                                  | G                      |
|-----|-------------------------------------|----------------------------------|------------------------------|----------|---------|------------------------------------|------------------------|
| 2   | ID                                  | Map on chromosome 2*/HGVS Name   | Position at mRNA*/HGVS Name  | Regions  | Summary | Minor Allele Frequency (MAF)/Count | MAF sources            |
| 135 | rs116498373                         | g.178122716C>T                   | c.45+6544G>A                 | intron 1 |         | T=0.0009/2                         | 1000 Genomes           |
| 136 | rs59896080                          | g.178122667T>C                   | c.45+6593A>G                 | intron 1 |         | C=0.0266/58                        | 1000 Genomes           |
| 137 | rs116388253                         | g.178122635A>G                   | c.45+6625T>C                 | intron 1 |         | G=0.0009/2                         | 1000 Genomes           |
| 138 | rs185321657                         | g.178122515G>A                   | c.45+6745C>T                 | intron 1 |         | A=0.0009/2                         | 1000 Genomes           |
| 139 | rs182287178                         | g.178122467C>A                   | c.45+6793G>T                 | intron 1 |         | A=0.0009/2                         | 1000 Genomes           |
| 140 | rs139003635                         | g.178122449C>T                   | c.45+6811G>A                 | intron 1 |         | T=0.0009/2                         | 1000 Genomes           |
| 141 | rs191346179                         | g.178122404T>C                   | c.45+6856A>G                 | intron 1 |         | C=0.0005/<br>T=0.257/562           | 1000 Genomes<br>PubMed |
| 142 | rs12471433                          | g.178122365A>C                   | c.45+6895T>G                 | intron 1 |         | C=0.348/760                        | 1000 Genomes           |
| 143 | rs116627712                         | g.178122330C>T                   | c.45+6930G>A                 | intron 1 |         | T=0.0023/5                         | 1000 Genomes           |
| 144 | rs146144436                         | g.178122328T>C                   | c.45+6932A>G                 | intron 1 |         | C=0.0018/4                         | 1000 Genomes           |
| 145 | rs12463389                          | g.178122301C>G                   | c.45+6965G>C                 | intron 1 |         | G=0.0124/27                        | 1000 Genomes           |
| 146 | rs186455300                         | g.178122237G>C                   | c.45+7023C>G                 | intron 1 |         | C=0.0005/1                         | 1000 Genomes           |
| 147 | rs148182648                         | g.178122204T>G                   | c.45+7056A>C                 | intron 1 |         | G=0.0005/1                         | 1000 Genomes           |
| 148 | rs181844919                         | g.178122193C>T                   | c.45+7067G>A                 | intron 1 |         | T=0.0009/2                         | 1000 Genomes           |
| 149 | rs143029845                         | g.178122141T>C                   | c.45+7119A>G                 | intron 1 |         | C=0.0023/5                         | 1000 Genomes           |
| 150 | rs190332705                         | g.178122082A>T                   | c.45+7178T>A                 | intron 1 |         | T=0.0005/1                         | 1000 Genomes           |
| 151 | rs75725292                          | g.178121960C>G                   | c.45+7300G>C                 | intron 1 |         | G=0.0005/1                         | 1000 Genomes           |
| 152 | rs185736510                         | g.178121903G>A                   | c.45+7357T>T                 | intron 1 |         | A=0.0009/2                         | 1000 Genomes           |
| 153 | rs149058464                         | g.178121881T>G                   | c.45+7379A>C                 | intron 1 |         | G=0.0023/5                         | 1000 Genomes           |
| 154 | rs146980194                         | g.178121707G>A                   | c.45+7553C>T                 | intron 1 |         | A=0.0082/18                        | 1000 Genomes           |
| 155 | rs73976300                          | g.178121653C>T                   | c.45+7607G>A                 | intron 1 |         | T=0.2015/440                       | 1000 Genomes           |
| 156 | rs35284526 (rs62173694)             | g.178121524C>A                   | c.45+7736G>T                 | intron 1 |         | A=0.228/498                        | 1000 Genomes           |
| 157 | rs181909458                         | g.178121493C>T                   | c.45+7767G>A                 | intron 1 |         | T=0.0009/2                         | 1000 Genomes           |
| 158 | rs202099449                         | g.178121470-178121477insC        | c.-45+7789_45+7790insG       | intron 1 |         | C=0.0069/15                        | 1000 Genomes           |
| 159 | rs189154074                         | g.178121430A>C                   | c.45+7830T>G                 | intron 1 |         | C=0.0009/2                         | 1000 Genomes           |
| 160 | rs141366133                         | g.178121377A>T                   | c.45+7883T>A                 | intron 1 |         | T=0.0023/5                         | 1000 Genomes           |
| 161 | rs201153247                         | g.178121249G>A                   | c.45+8017C>T                 | intron 1 |         | na                                 |                        |
| 162 | rs60758950                          | g.178121228delA                  | c.45+8018delT                | intron 1 |         | na                                 |                        |
| 163 | rs35073132 (rs71007983,rs150436082) | g.178121228_178121229insA, insAA | c.45+8031_45+8032insT, insTT | intron 1 |         | na                                 |                        |
| 164 | rs13005431§ (rs17647486,rs59481023) | g.178121112T>C                   | c.45+8148A>G                 | intron 1 |         | C=0.2679/585                       | 1000 Genomes           |
| 165 | rs77123162                          | g.178121031A>G                   | c.45+8229T>C                 | intron 1 |         | na                                 |                        |
| 166 | rs13028464 (rs59757069)             | g.178121005C>T                   | c.45+8255G>A                 | intron 1 |         | T=0.2344/512                       | 1000 Genomes           |
| 167 | rs183754294                         | g.178120975A>G                   | c.45+8285T>C                 | intron 1 |         | G=0.0005/1                         | 1000 Genomes           |
| 168 | rs77164235                          | g.178120972A>G                   | c.45+8288T>C                 | intron 1 |         | G=0.0018/4                         | 1000 Genomes           |
| 169 | rs61130794                          | g.178120681G>T                   | c.45+8579C>A                 | intron 1 |         | T=0.0073/16                        | 1000 Genomes           |
| 170 | rs79705589                          | g.178120666G>T                   | c.45+8594C>A                 | intron 1 |         | T=0.0147/32                        | 1000 Genomes           |
| 171 | rs75868895                          | g.178120587C>T                   | c.45+8673G>A                 | intron 1 |         | T=0.0082/18                        | 1000 Genomes           |
| 172 | rs147830306                         | g.178120425T>C                   | c.45+8835A>G                 | intron 1 |         | C=0.0069/15                        | 1000 Genomes           |
| 173 | rs10188193 (rs58739067)             | g.178120391T>C                   | c.45+8869A>G                 | intron 1 |         | T=0.1474/322                       | 1000 Genomes           |
| 174 | rs10188107 (rs56820148)             | g.178120312T>G                   | c.45+8948A>C                 | intron 1 |         | T=0.1474/322                       | 1000 Genomes           |
| 175 | rs180825596                         | g.178120188T>C                   | c.45+9072A>G                 | intron 1 |         | C=0.0005/1                         | 1000 Genomes           |
| 176 | rs1444483619                        | g.178120104T>C                   | c.45+9156A>G                 | intron 1 |         | C=0.0005/1                         | 1000 Genomes           |
| 177 | rs73031369                          | g.178120037C>A                   | c.45+9223G>T                 | intron 1 |         | A=0.0073/16                        | 1000 Genomes           |
| 178 | rs15035228                          | g.178119953G>A                   | c.45+9307C>T                 | intron 1 |         | A=0.0023/5                         | 1000 Genomes           |
| 179 | rs142832274                         | g.178119904G>C                   | c.45+9356C>G                 | intron 1 |         | C=0.0005/1                         | 1000 Genomes           |
| 180 | rs79225171                          | g.178119883T>C                   | c.45+9377A>G                 | intron 1 |         | C=0.0073/16                        | 1000 Genomes           |
| 181 | rs80240774                          | g.178119836G>A                   | c.45+9424C>T                 | intron 1 |         | A=0.0005/1                         | 1000 Genomes           |
| 182 | rs148529343                         | g.178119818C>T                   | c.45+9442G>A                 | intron 1 |         | T=0.0069/15                        | 1000 Genomes           |
| 183 | rs58549185                          | g.178119733A>G                   | c.45+9527T>C                 | intron 1 |         | G=0.0073/16                        | 1000 Genomes           |
| 184 | rs144747513                         | g.178119713T>C                   | c.45+9547A>G                 | intron 1 |         | C=0.0023/5                         | 1000 Genomes           |
| 185 | rs189688195                         | g.178119676T>C                   | c.45+9584A>G                 | intron 1 |         | C=0.0014/3                         | 1000 Genomes           |
| 186 | rs143718832                         | g.178119567T>C                   | c.45+9693A>G                 | intron 1 |         | C=0.0009/2                         | 1000 Genomes           |
| 187 | rs11892777 (rs61284966)             | g.178119515T>C                   | c.45+9753A>G                 | intron 1 |         | C=0.0183/40                        | 1000 Genomes           |
| 188 | rs140110914                         | g.178119366C>T                   | c.45+9894G>A                 | intron 1 |         | T=0.0069/15                        | 1000 Genomes           |
| 189 | rs111914065                         | g.178119340C>T                   | c.45+9920G>A                 | intron 1 |         | T=0.0078/17                        | 1000 Genomes           |
| 190 | rs146125836                         | g.178119332T>A                   | c.45+9928A>T                 | intron 1 |         | A=0.0037/8                         | 1000 Genomes           |
| 191 | rs115740359                         | g.178119313A>T                   | c.45+9947T>A                 | intron 1 |         | T=0.0005/1                         | 1000 Genomes           |
| 192 | rs10497511 (rs59034007)             | g.178119296G>A                   | c.45+9964C>T                 | intron 1 |         | G=0.1479/323                       | 1000 Genomes           |
| 193 | rs36030784 (rs62173693)             | g.178119204A>C                   | c.45+10056T>G                | intron 1 |         | C=0.2285/499                       | 1000 Genomes           |
| 194 | rs184967958                         | g.178119169G>C                   | c.45+10091C>G                | intron 1 |         | C=0.0005/1                         | 1000 Genomes           |
| 195 | rs74762867                          | g.178119125A>C                   | c.45+10135T>G                | intron 1 |         | na                                 |                        |
| 196 | rs11886935                          | g.178119040G>C                   | c.45+10228C>G                | intron 1 |         | A=0.0014/3                         | 1000 Genomes           |
| 197 | rs143013625                         | g.178119021T>G                   | c.45+10239A>C                | intron 1 |         | G=0.0055/12                        | 1000 Genomes           |
| 198 | rs13001694§                         | g.178118990A>G                   | c.45+10270T>C                | intron 1 |         | G=0.271/591<br>G=0.401/1578        | 1000 Genomes<br>PubMed |
| 199 | rs192577308                         | g.178118878G>A                   | c.45+10382C>T                | intron 1 |         | A=0.0014/3<br>T=0.2569/562         | 1000 Genomes<br>PubMed |
| 200 | rs187543639                         | g.178118702G>A                   | c.45+10558C>T                | intron 1 |         | A=0.0027/6                         | 1000 Genomes           |
| 201 | rs2001297                           | g.178118550C>A                   | c.45+10710G>T                | intron 1 |         | C=0.1937/423                       | 1000 Genomes           |
| 202 | rs6708603                           | g.178118544A>T                   | c.45+10716T>A                | intron 1 |         | na                                 |                        |

|     | A                                               | B                                | C                              | D        | E       | F                                  | G                                 |
|-----|-------------------------------------------------|----------------------------------|--------------------------------|----------|---------|------------------------------------|-----------------------------------|
| 2   | ID                                              | Map on chromosome 2*/HGVS Name   | Position at mRNA*/HGVS Name    | Regions  | Summary | Minor Allele Frequency (MAF)/Count | MAF sources                       |
| 203 | rs34278329                                      | g.178118438_178118439insT        | c.45+10821_45+10822insA        | intron 1 |         | na                                 |                                   |
| 204 | rs116539895                                     | g.17811839A>G                    | c.45+10861T>C                  | intron 1 |         | G=0.0197/43                        | 1000 Genomes                      |
| 205 | rs34820876§                                     | g.178118341A>G                   | c.45+10919T>C                  | intron 1 |         | G=0.011/25                         | 1000 Genomes                      |
| 206 | rs73031364                                      | g.178118298C>A                   | c.45+10962G>T                  | intron 1 |         | A=0.0078/17                        | 1000 Genomes                      |
| 207 | rs150507179                                     | g.178118287C>T                   | c.45+10973G>A                  | intron 1 |         | T=0.0005/1                         | 1000 Genomes                      |
| 208 | rs9282797                                       | g.178118218C>T                   | c.45+11050G>A                  | intron 1 |         | na                                 |                                   |
| 209 | rs1806649§ (rs58745895)                         | g.178118152C>T                   | c.45+11108G>A                  | intron 1 |         | T=0.139/303                        | 1000 Genomes<br>various<br>PubMed |
| 210 | rs141266257                                     | g.178118128_178118129insCTTTA    | c.45+11131_45+11132insTAAAG    | intron 1 |         | CTTTA=0.0073/16                    | 1000 Genomes                      |
| 211 | rs36031254                                      | g.178118020_178118021insC        | c.45+11239_45+11240insG        | intron 1 |         | na                                 |                                   |
| 212 | rs9282798                                       | g.178118005A>G                   | c.45+11255T>C                  | intron 1 |         | G=0.006/13                         | 1000 Genomes                      |
| 213 | rs116768505                                     | g.178117926C>A                   | c.45+11334G>T                  | intron 1 |         | A=0.0005/1                         | 1000 Genomes                      |
| 214 | rs148002504                                     | g.178117902A>T                   | c.45+11358T>A                  | intron 1 |         | T=0.0027/6                         | 1000 Genomes                      |
| 215 | rs4243387§ (rs60038464)                         | g.178117765C>T                   | c.45+11495G>A                  | intron 1 |         | C=0.272/594<br>T=0.091/425         | 1000 Genomes<br>PubMed            |
| 216 | rs146950673                                     | g.178117727T>C                   | c.45+11533A>G                  | intron 1 |         | C=0.0005/1                         | 1000 Genomes                      |
| 217 | rs142761256                                     | g.178117669T>G                   | c.45+11591A>C                  | intron 1 |         | G=0.0037/8                         | 1000 Genomes                      |
| 218 | rs113166073                                     | g.178117645G>A                   | c.45+11615C>T                  | intron 1 |         | A=0.0147/32                        | 1000 Genomes                      |
| 219 | rs184355665                                     | g.178117519C>T                   | c.45+11741G>A                  | intron 1 |         | T=0.0005/1                         | 1000 Genomes                      |
| 220 | rs192689231                                     | g.178117410G>A                   | c.45+11850C>T                  | intron 1 |         | A=0.0009/2<br>C=0.194/424          | 1000 Genomes<br>PubMed            |
| 221 | rs117045674                                     | g.178117408C>T                   | c.45+11852G>A                  | intron 1 |         | T=0.006/13                         | 1000 Genomes                      |
| 222 | rs200763783                                     | g.178117391T>G                   | c.45+11869A>C                  | intron 1 |         | na                                 |                                   |
| 223 | rs35252336                                      | g.178117391_178117392insG        | c.45+11868_45+11869insC        | intron 1 |         | na                                 |                                   |
| 224 | rs2886160 (rs60051182,rs67592643,rs79053437)    | g.178117390T>G, delT             | c.45+11870A>C, delA            | intron 1 |         | na                                 |                                   |
| 225 | rs201359924                                     | g.178117390_178117391insG        | c.45+11869_45+11870insC        | intron 1 |         | na                                 |                                   |
| 226 | rs61040831                                      | g.178117389T>C                   | c.45+11871A>G                  | intron 1 |         | na                                 |                                   |
| 227 | rs66526442                                      | g.178117389_178117390insC        | c.45+11870_45+11871insG        | intron 1 |         | na                                 |                                   |
| 228 | rs56307341 (rs58616691,rs147659763,rs147723007) | g.178117388_178117389insC        | c.45+11871_45+11872insG        | intron 1 |         | na                                 |                                   |
| 229 | rs187858565                                     | g.178117355C>T                   | c.45+11905G>A                  | intron 1 |         | T=0.0005/1                         | 1000 Genomes                      |
| 230 | rs138787742                                     | g.178117314T>C                   | c.45+11946A>G                  | intron 1 |         | C=0.0009/2                         | 1000 Genomes                      |
| 231 | rs182714514                                     | g.178117139T>C                   | c.45+12121A>G                  | intron 1 |         | C=0.0009/2                         | 1000 Genomes                      |
| 232 | rs146047420                                     | g.178117117T>C                   | c.45+12143A>G                  | intron 1 |         | C=0.0014/3                         | 1000 Genomes                      |
| 233 | rs190952229                                     | g.178117075G>A                   | c.45+12185C>T                  | intron 1 |         | A=0.0009/2                         | 1000 Genomes                      |
| 234 | rs149108953                                     | g.178116992G>A                   | c.45+12268C>T                  | intron 1 |         | A=0.0014/3                         | 1000 Genomes                      |
| 235 | rs145124788                                     | g.178116977C>T                   | c.45+12283G>A                  | intron 1 |         | T=0.0005/1                         | 1000 Genomes                      |
| 236 | rs115767871                                     | g.178116927T>C                   | c.45+12288A>G                  | intron 1 |         | C=0.0005/1                         | 1000 Genomes                      |
| 237 | rs72361960                                      | g.178116750_178116751insT        | c.45+12509_45+12510insA        | intron 1 |         | na                                 |                                   |
| 238 | rs33982505                                      | g.178116746_178116747insA, insAA | c.45+12513_45+12514insT, insTT | intron 1 |         | na                                 |                                   |
| 239 | rs3082509 (rs60006121)                          | g.178116744_178116745insA, insAA | c.45+12514_45+12515insT, insTT | intron 1 |         | na                                 |                                   |
| 240 | rs200171393                                     | g.178116736_178116737insCAC      | c.45+12523_45_12524insGTG      | intron 1 |         | na                                 |                                   |
| 241 | rs72157284 (rs72204928,rs140495787,rs150994047) | g.178116729_178116730insAA       | c.45+12530_45+12531insTT       | intron 1 |         | na                                 |                                   |
| 242 | rs150396319                                     | g.178116628G>A                   | c.45+12632C>T                  | intron 1 |         | A=0.0284/62                        | 1000 Genomes                      |
| 243 | rs140431489                                     | g.178116591A>G                   | c.45+12669T>C                  | intron 1 |         | G=0.011/24                         | 1000 Genomes                      |
| 244 | rs187515930                                     | g.178116531A>C                   | c.45+12729T>G                  | intron 1 |         | C=0.0027/6                         | 1000 Genomes                      |
| 245 | rs183339181                                     | g.178116529C>T                   | c.45+12731G>A                  | intron 1 |         | T=0.0005/1                         | 1000 Genomes                      |
| 246 | rs117263449                                     | g.178116459C>T                   | c.45+12801G>A                  | intron 1 |         | T=0.0215/47                        | 1000 Genomes                      |
| 247 | rs189958480                                     | g.178116328G>A                   | c.45+12932C>T                  | intron 1 |         | A=0.0005/1                         | 1000 Genomes                      |
| 248 | rs185889362                                     | g.178116284T>C                   | c.45+12976A>G                  | intron 1 |         | C=0.0064/14                        | 1000 Genomes                      |
| 249 | rs72944931                                      | g.178116262A>G                   | c.45+12998T>C                  | intron 1 |         | G=0.0114/25                        | 1000 Genomes                      |
| 250 | rs113118970                                     | g.178116158A>G                   | c.45+13102T>C                  | intron 1 |         | G=0.0105/23                        | 1000 Genomes                      |
| 251 | rs35673620                                      | g.178115961_178115962insA        | c.45+13298_45+13299insT        | intron 1 |         | na                                 |                                   |
| 252 | rs181502240                                     | g.178115801T>C                   | c.45+13459A>G                  | intron 1 |         | C=0.0005/1                         | 1000 Genomes                      |
| 253 | rs143650089                                     | g.178115769A>G                   | c.45+13491T>C                  | intron 1 |         | G=0.0037/8                         | 1000 Genomes                      |
| 254 | rs191012195                                     | g.178115764C>G                   | c.45+13496G>C                  | intron 1 |         | G=0.014/3                          | 1000 Genomes                      |
| 255 | rs34658646                                      | g.178115618_178115619insG        | c.45+13651_45+13652insC        | intron 1 |         | na                                 |                                   |
| 256 | rs186163066                                     | g.178115610G>A                   | c.45+13650C>T                  | intron 1 |         | A=0.0005/1                         | 1000 Genomes                      |
| 257 | rs116239726                                     | g.178115553G>T                   | c.45+13707C>A                  | intron 1 |         | T=0.0133/29                        | 1000 Genomes                      |
| 258 | rs181980037                                     | g.178115440A>G                   | c.45+13820T>C                  | intron 1 |         | G=0.0009/2                         | 1000 Genomes                      |
| 259 | rs189513762                                     | g.178115356G>A                   | c.45+13904C>T                  | intron 1 |         | A=0.0005/1                         | 1000 Genomes                      |
| 260 | rs79766920                                      | g.178115351G>A                   | c.45+13909C>T                  | intron 1 |         | A=0.0201/44                        | 1000 Genomes                      |
| 261 | rs140078582                                     | g.178115016A>C                   | c.45+14244T>G                  | intron 1 |         | C=0.0027/6                         | 1000 Genomes                      |
| 262 | rs146606218                                     | g.178114972G>A                   | c.45+14288C>T                  | intron 1 |         | A=0.0027/6                         | 1000 Genomes                      |
| 263 | rs184136380                                     | g.178114810T>C                   | c.45+14450A>G                  | intron 1 |         | C=0.0005/1                         | 1000 Genomes                      |
| 264 | rs142852961                                     | g.178114784_178114785insT        | c.45+14475_45+14476insA        | intron 1 |         | na                                 |                                   |
| 265 | rs181379009                                     | g.178114761A>T                   | c.45+14499T>A                  | intron 1 |         | T=0.0009/2                         | 1000 Genomes                      |
| 266 | rs188661334                                     | g.178114750T>G                   | c.45+14510A>C                  | intron 1 |         | G=0.0005/1                         | 1000 Genomes                      |
| 267 | rs78372947                                      | g.178114740C>G                   | c.45+14520G>C                  | intron 1 |         | G=0.0183/40                        | 1000 Genomes                      |

|     | A                                   | B                                    | C                                 | D        | E       | F                                  | G                      |
|-----|-------------------------------------|--------------------------------------|-----------------------------------|----------|---------|------------------------------------|------------------------|
| 2   | ID                                  | Map on chromosome 2#/HGVS Name       | Position at mRNA#/HGVS Name       | Regions  | Summary | Minor Allele Frequency (MAF)/Count | MAF sources            |
| 268 | rs111421909                         | g.178114726C>T                       | c.45+14534G>A                     | intron 1 |         | na                                 |                        |
| 269 | rs184693304                         | g.178114711G>A                       | c.45+14549C>T                     | intron 1 |         | A=0.0005/1                         | 1000 Genomes           |
| 270 | rs10930781 (rs58817956,rs59650324)  | g.178114632A>G                       | c.45+14628T>C                     | intron 1 |         | A=0.1456/318                       | 1000 Genomes           |
| 271 | rs142945272                         | g.178114528A>G                       | c.45+14732T>C                     | intron 1 |         | G=0.0096/21                        | 1000 Genomes           |
| 272 | rs201025738                         | g.178114350delT                      | c.45+14910delA                    | intron 1 |         | -=0.0032/7                         | 1000 Genomes           |
| 273 | rs192095254                         | g.178114281T>C                       | c.45+14979A>G                     | intron 1 |         | C=0.0005/1                         | 1000 Genomes           |
| 274 | rs139805097                         | g.178114165T>A                       | c.45+15095A>T                     | intron 1 |         | na                                 |                        |
| 275 | rs75255145                          | g.178113977delA,delAinsATAAATAAATAA  | c.46-14978delT,delTinsTTATTATTAT  | intron 1 |         | na                                 |                        |
| 276 | rs71007982                          | g.178113977_178113978insATAA         | c.46-14979_46-14978insTTAT        | intron 1 |         | na                                 |                        |
| 277 | rs140315872                         | g.178113949_178113950insAATA         | c.46-14951_46-14950insTATT        | intron 1 |         | na                                 |                        |
| 278 | rs143555304                         | g.178113947_178113948insTAAA         | c.46-14949_46-14948insTTTA        | intron 1 |         | na                                 |                        |
| 279 | rs143999145                         | g.178113946_178113957delATAAATAAATAA | c.46-14920_46-14905delTTATTATTAT  | intron 1 |         | na                                 |                        |
| 280 | rs66799448 (rs66799449,rs72271571)  | g.178113946_178113947insATAA         | c.46-14948_46-14947insTTAT        | intron 1 |         | na                                 |                        |
| 281 | rs76027118                          | g.178113945delC,delCinsCATAAATAAATAA | c.46-14946delG,delGinsTTATTATTATG | intron 1 |         | na                                 |                        |
| 282 | rs145023006                         | g.178113945_178113946insATAA         | c.46-14947_46-14946insTTAT        | intron 1 |         | na                                 |                        |
| 283 | rs188009045                         | g.178113894C>T                       | c.46-14895G>A                     | intron 1 |         | T=0.0005/1                         | 1000 Genomes           |
| 284 | rs185778554                         | g.178113823C>T                       | c.46-14824G>A                     | intron 1 |         | T=0.0018/4                         | 1000 Genomes           |
| 285 | rs13422804                          | g.178113818C>T                       | c.46-14777G>A                     | intron 1 |         | T=0.0041/9                         | 1000 Genomes           |
| 286 | rs78907891                          | g.178113798A>T                       | c.46-14757T>A                     | intron 1 |         | na                                 |                        |
| 287 | rs73031362                          | g.178113650C>T                       | c.46-14609G>A                     | intron 1 |         | T=0.0082/18                        | 1000 Genomes           |
| 288 | rs111914348                         | g.178113625C>A                       | c.46-14584G>T                     | intron 1 |         | na                                 |                        |
| 289 | rs149437504                         | g.178113544A>G                       | c.46-14545T>C                     | intron 1 |         | G=0.0078/17                        | 1000 Genomes           |
| 290 | rs1962142§ (rs58448508)             | g.178113484A>G                       | c.46-14485T>C                     | intron 1 |         | A=0.127/278<br>A=0.082             | 1000 Genomes<br>PubMed |
| 291 | rs11690278                          | g.178113415G>A                       | c.46-14374C>T                     | intron 1 |         | A=0.0169/37                        | 1000 Genomes           |
| 292 | rs187910577                         | g.178113379C>T                       | c.46-14380G>A                     | intron 1 |         | T=0.0023/5                         | 1000 Genomes           |
| 293 | rs6732277                           | g.178113284T>C                       | c.46-14243A>G                     | intron 1 |         | C=0.0357/78                        | 1000 Genomes           |
| 294 | rs147355361                         | g.178113247C>G                       | c.46-14248G>C                     | intron 1 |         | G=0.0032/7                         | 1000 Genomes           |
| 295 | rs182370982                         | g.178113204C>G                       | c.46-14205G>C                     | intron 1 |         | G=0.0027/6                         | 1000 Genomes           |
| 296 | rs112353264                         | g.178113199G>A                       | c.46-14158C>T                     | intron 1 |         | A=0.005/11                         | 1000 Genomes           |
| 297 | rs190302019                         | g.178113048A>G                       | c.46-14049T>C                     | intron 1 |         | G=0.0023/5                         | 1000 Genomes           |
| 298 | rs186938958                         | g.178113043C>G                       | c.46-14044G>C                     | intron 1 |         | G=0.0005/1                         | 1000 Genomes           |
| 299 | rs138763384                         | g.178113018T>C                       | c.46-14019A>G                     | intron 1 |         | C=0.0005/1                         | 1000 Genomes           |
| 300 | rs182971839                         | g.178112950C>T                       | c.46-13951G>A                     | intron 1 |         | T=0.0009/2                         | 1000 Genomes           |
| 301 | rs190576796                         | g.178112937G>A                       | c.46-13938C>T                     | intron 1 |         | A=0.0014/3                         | 1000 Genomes           |
| 302 | rs186597219                         | g.178112841C>G                       | c.-3-13842G>C                     | intron 1 |         | G=0.0005/1                         | 1000 Genomes           |
| 303 | rs75202993                          | g.178112725G>A                       | c.46-13684C>T                     | intron 1 |         | A=0.0169/37                        | 1000 Genomes           |
| 304 | rs114146136                         | g.178112722A>G                       | c.46-13681T>C                     | intron 1 |         | G=0.0133/29                        | 1000 Genomes           |
| 305 | rs2272529                           | g.178112710G>A                       | c.46-13711C>T                     | intron 1 |         | A=0.0105/23                        | 1000 Genomes           |
| 306 | rs115116838                         | g.178112611C>T                       | c.46-13612G>A                     | intron 1 |         | T=0.0133/29                        | 1000 Genomes           |
| 307 | rs111510170                         | g.178112592C>T                       | c.46-13593G>A                     | intron 1 |         | na                                 |                        |
| 308 | rs77635085                          | g.178112455A>G                       | c.46-13456T>C                     | intron 1 |         | G=0.0156/34                        | 1000 Genomes           |
| 309 | rs113754574                         | g.178112431G>A                       | c.46-13432C>T                     | intron 1 |         | na                                 |                        |
| 310 | rs57701650                          | g.178112413_178112414insA            | c.46-13415_46-13414insT           | intron 1 |         | na                                 |                        |
| 311 | rs182424203                         | g.178112395A>G                       | c.46-13396T>C                     | intron 1 |         | G=0.0032/7                         | 1000 Genomes           |
| 312 | rs79008407                          | g.178112370A>C                       | c.46-13371T>G                     | intron 1 |         | na                                 |                        |
| 313 | rs112007423                         | g.178112361T>C                       | c.46-13362A>G                     | intron 1 |         | C=0.0073/16                        | 1000 Genomes           |
| 314 | rs191798810                         | g.178112344G>A                       | c.46-13345C>T                     | intron 1 |         | A=0.0027/16<br>G=0.352/771         | 1000 Genomes<br>PubMed |
| 315 | rs111436754                         | g.178112304G>A                       | c.46-13305C>T                     | intron 1 |         | A=0.0183/40                        | 1000 Genomes           |
| 316 | rs10195986                          | g.178112271C>T                       | c.46-13272G>A                     | intron 1 |         | na                                 |                        |
| 317 | rs186271356                         | g.178112242A>T                       | c.46-13243T>A                     | intron 1 |         | T=0.0005/1                         | 1000 Genomes           |
| 318 | rs143584629                         | g.178112237A>C                       | c.46-13238T>G                     | intron 1 |         | C=0.0005/1                         | 1000 Genomes           |
| 319 | rs180826227                         | g.178112169C>T                       | c.46-13170G>A                     | intron 1 |         | T=0.005/11                         | 1000 Genomes           |
| 320 | rs112025320                         | g.178112111C>T                       | c.46-13112G>A                     | intron 1 |         | T=0.0087/19                        | 1000 Genomes           |
| 321 | rs117830843                         | g.178112093A>G                       | c.46-13094T>C                     | intron 1 |         | G=0.0018/4                         | 1000 Genomes           |
| 322 | rs188812542                         | g.178111750A>T                       | c.46-12751T>A                     | intron 1 |         | T=0.0005/1                         | 1000 Genomes           |
| 323 | rs185623828                         | g.178111698C>A                       | c.46-12699G>T                     | intron 1 |         | A=0/0                              | 1000 Genomes           |
| 324 | rs72355286                          | g.178111503delT,delTinsTTTTTT        | c.46-12504delA,delAinsAAAAAA      | intron 1 |         | na                                 |                        |
| 325 | rs56311819 (rs57305123,rs146762456) | g.178111503_178111504insT            | c.46-12505_46-12504insA           | intron 1 |         | na                                 |                        |
| 326 | rs76882261                          | g.178111336delC,delCinsCT            | c.46-12337delG,delGinsAG          | intron 1 |         | na                                 |                        |
| 327 | rs11686945 (suspected)              | g.178111336C>T                       | c.46-12337G>A                     | intron 1 |         | na                                 |                        |
| 328 | rs181165445                         | g.178111250A>G                       | c.46-12251T>C                     | intron 1 |         | G=0.0005/1                         | 1000 Genomes           |
| 329 | rs189142028                         | g.178111214T>C                       | c.46-12215A>G                     | intron 1 |         | C=0.0005/1                         | 1000 Genomes           |
| 330 | rs115141505                         | g.178111212C>A                       | c.46-12213G>T                     | intron 1 |         | A=0.0133/29                        | 1000 Genomes           |
| 331 | rs148905429                         | g.178111131A>G                       | c.46-12132T>C                     | intron 1 |         | G=0.0018/4                         | 1000 Genomes           |
| 332 | rs185016960                         | g.178111020G>A                       | c.46-12021C>T                     | intron 1 |         | A=0.0009/2                         | 1000 Genomes           |
| 333 | rs115761043                         | g.178110967A>T                       | c.46-11968T>A                     | intron 1 |         | T=0.0169/37                        | 1000 Genomes           |
| 334 | rs6708442                           | g.178110902G>A                       | c.46-11903C>T                     | intron 1 |         | A=0.0018/4                         | 1000 Genomes           |

|     | A                                                | B                              | C                           | D        | E       | F                                  | G                      |
|-----|--------------------------------------------------|--------------------------------|-----------------------------|----------|---------|------------------------------------|------------------------|
| 2   | ID                                               | Map on chromosome 2*/HGVS Name | Position at mRNA*/HGVS Name | Regions  | Summary | Minor Allele Frequency (MAF)/Count | MAF sources            |
| 335 | rs145026902                                      | g.178110882C>A                 | c.46-11883G>T               | intron 1 |         | A=0.0005/1                         | 1000 Genomes           |
| 336 | rs142933347                                      | g.178110789A>T                 | c.46-11790T>A               | intron 1 |         | T=0.0014/3                         | 1000 Genomes           |
| 337 | rs111748124                                      | g.178110781T>A                 | c.46-11782A>T               | intron 1 |         | na                                 |                        |
| 338 | rs146588063                                      | g.178110773C>G                 | c.46-11774G>C               | intron 1 |         | G=0.0014/3                         | 1000 Genomes           |
| 339 | rs150030372                                      | g.178110675G>C                 | c.46-11676C>G               | intron 1 |         | C=0.0014/3                         | 1000 Genomes           |
| 340 | rs139344881                                      | g.178110664G>A                 | c.46-11665C>T               | intron 1 |         | A=0.0005/1                         | 1000 Genomes           |
| 341 | rs193259326                                      | g.178110651T>G                 | c.46-11652A>C               | intron 1 |         | G=0.0018/4<br>T=0.1495/327         | 1000 Genomes<br>PubMed |
| 342 | rs151304786                                      | g.178110643T>G                 | c.46-11644A>C               | intron 1 |         | G=0.0014/3                         | 1000 Genomes           |
| 343 | rs190382043                                      | g.178110527G>A                 | c.46-11528C>T               | intron 1 |         | A=0.0009/2                         | 1000 Genomes           |
| 344 | rs75707887                                       | g.178110355T>G                 | c.46-11356A>C               | intron 1 |         | na                                 |                        |
| 345 | rs80349357                                       | g.178110344T>C                 | c.46-11345A>G               | intron 1 |         | na                                 |                        |
| 346 | rs76185529                                       | g.178110343C>T                 | c.46-11344G>A               | intron 1 |         | na                                 |                        |
| 347 | rs12067562                                       | g.178110342_178110343insT      | rs11344_46-11343insA        | intron 1 |         | na                                 |                        |
| 348 | rs117962208                                      | g.178110283G>T                 | c.46-11284C>A               | intron 1 |         | T=0.0133/29                        | 1000 Genomes           |
| 349 | rs14026669                                       | g.178110124C>T                 | c.46-11125G>A               | intron 1 |         | T=0.0032/7                         | 1000 Genomes           |
| 350 | rs184607299                                      | g.178110003C>T                 | c.46-11004G>A               | intron 1 |         | T=0.0005/1                         | 1000 Genomes           |
| 351 | rs13402068 (rs58997687)                          | g.178109961A>G                 | c.46-10962T>C               | intron 1 |         | G=0.0421/92                        | 1000 Genomes           |
| 352 | rs147349290                                      | g.178109836G>C                 | c.46-10837C>G               | intron 1 |         | C=0.0101/22                        | 1000 Genomes           |
| 353 | rs56326022<br>(rs60030129,rs72065105,rs13980925) | g.178109731delA                | c.46-10732delT              | intron 1 |         | na                                 |                        |
| 354 | rs191181286                                      | g.178109601G>A                 | c.46-10602C>T               | intron 1 |         | A=0.0009/2                         | 1000 Genomes           |
| 355 | rs142715562                                      | g.178109509C>T                 | c.46-10510G>A               | intron 1 |         | T=0.022/48                         | 1000 Genomes           |
| 356 | rs116769762                                      | g.178109434A>C                 | c.46-10435T>G               | intron 1 |         | C=0.0082/18                        | 1000 Genomes           |
| 357 | rs140376711                                      | g.178109418G>A                 | c.46-10419C>T               | intron 1 |         | A=0.0005/1                         | 1000 Genomes           |
| 358 | rs186556119                                      | g.178109372C>T                 | c.46-10373G>A               | intron 1 |         | T=0.0018/4                         | 1000 Genomes           |
| 359 | rs147158417                                      | g.178109353C>T                 | c.46-10354G>A               | intron 1 |         | T=0.0014/3                         | 1000 Genomes           |
| 360 | rs149487711                                      | g.178109095C>T                 | c.46-10096G>A               | intron 1 |         | T=0.0105/23                        | 1000 Genomes           |
| 361 | rs200836049                                      | g.178109031A>C                 | c.46-10032T>G               | intron 1 |         | na                                 |                        |
| 362 | rs77969647                                       | g.178109024C>A                 | c.46-10025G>T               | intron 1 |         | na                                 |                        |
| 363 | rs182574883                                      | g.178108987G>A                 | c.46-9988C>T                | intron 1 |         | A=0.0027/6                         | 1000 Genomes           |
| 364 | rs76718685                                       | g.178108879A>T                 | c.46-9880T>A                | intron 1 |         | na                                 |                        |
| 365 | rs75671898                                       | g.178108841A>T                 | c.46-9842T>A                | intron 1 |         | na                                 |                        |
| 366 | rs191513071                                      | g.178108766C>T                 | c.46-9767G>A                | intron 1 |         | T=0.0032/7<br>A=0.452/988          | 1000 Genomes<br>PubMed |
| 367 | rs188666710                                      | g.178108748G>T                 | c.46-9749C>A                | intron 1 |         | T=0.0005/1                         | 1000 Genomes           |
| 368 | rs183421956                                      | g.178108646G>A                 | c.46-9647C>T                | intron 1 |         | A=0.0009/2                         | 1000 Genomes           |
| 369 | rs114513152                                      | g.178108565A>G                 | c.46-9566T>C                | intron 1 |         | G=0.0064/14                        | 1000 Genomes           |
| 370 | rs77941510                                       | g.178108552C>T                 | c.46-9553G>A                | intron 1 |         | T=0.0316/69                        | 1000 Genomes           |
| 371 | rs138012339                                      | g.178108493A>C                 | c.46-9494T>G                | intron 1 |         | C=0.0105/23                        | 1000 Genomes           |
| 372 | rs35069293                                       | g.178108371_178108372insC      | c.46-9373_46-9372insG       | intron 1 |         | na                                 |                        |
| 373 | rs200105240                                      | g.178108260_178108261insT      | c.46-9262_46-9261insA       | intron 1 |         | na                                 |                        |
| 374 | rs192468336                                      | g.178108202G>A                 | c.46-9203C>T                | intron 1 |         | A=0.0009/2<br>C=0.1453/318         | 1000 Genomes<br>PubMed |
| 375 | rs116275305                                      | g.178108149C>T                 | c.46-9150G>A                | intron 1 |         | T=0.0009/2                         | 1000 Genomes           |
| 376 | rs150772414                                      | g.178108061T>A                 | c.46-9062A>T                | intron 1 |         | A=0.0073/16                        | 1000 Genomes           |
| 377 | rs141344720                                      | g.178107955C>T                 | c.46-8956G>A                | intron 1 |         | T=0.0014/3                         | 1000 Genomes           |
| 378 | rs138781057                                      | g.178107942T>G                 | c.46-8943A>C                | intron 1 |         | G=0.0082/18                        | 1000 Genomes           |
| 379 | rs181023734                                      | g.178107878T>C                 | c.46-8879A>G                | intron 1 |         | na                                 |                        |
| 380 | rs144971306                                      | g.178107794C>T                 | c.46-8795G>A                | intron 1 |         | T=0.0005/1                         | 1000 Genomes           |
| 381 | rs141247651                                      | g.178107718G>A                 | c.46-8719C>T                | intron 1 |         | A=0.0032/7                         | 1000 Genomes           |
| 382 | rs200970759                                      | g.178107648_178107649insT      | c.46-8650_46-8649insA       | intron 1 |         | na                                 |                        |
| 383 | rs187134041                                      | g.178107553C>T                 | c.46-8554G>A                | intron 1 |         | T=0.0005/1                         | 1000 Genomes           |
| 384 | rs138239588                                      | g.178107503C>T                 | c.46-8504G>A                | intron 1 |         | T=0.0009/2                         | 1000 Genomes           |
| 385 | rs116817143                                      | g.178107277A>G                 | c.46-8278T>C                | intron 1 |         | G=0.0009/2                         | 1000 Genomes           |
| 386 | rs182398641                                      | g.178107256G>T                 | c.46-8257C>A                | intron 1 |         | T=0.0005/1                         | 1000 Genomes           |
| 387 | rs189940034                                      | g.178107203T>A                 | c.46-8204A>T                | intron 1 |         | A=0.0005/1                         | 1000 Genomes           |
| 388 | rs185180616                                      | g.178107167G>T                 | c.46-8168C>A                | intron 1 |         | T=0.0005/1                         | 1000 Genomes           |
| 389 | rs143692702                                      | g.178107161A>G                 | c.46-8162T>C                | intron 1 |         | G=0.0046/10                        | 1000 Genomes           |
| 390 | rs181313752                                      | g.178107122T>C                 | c.46-8123A>G                | intron 1 |         | C=0.0005/1                         | 1000 Genomes           |
| 391 | rs148958299                                      | g.178107102T>A                 | c.46-8103A>T                | intron 1 |         | A=0.0032/7                         | 1000 Genomes           |
| 392 | rs145790450                                      | g.178107039T>C                 | c.46-8040A>G                | intron 1 |         | C=0.0005/1                         | 1000 Genomes           |
| 393 | rs189392144                                      | g.178107038A>G                 | c.46-8039T>C                | intron 1 |         | G=0.0005/1                         | 1000 Genomes           |
| 394 | rs149835220                                      | g.178106962G>A                 | c.46-7963C>T                | intron 1 |         | A=0.0027/6                         | 1000 Genomes           |
| 395 | rs142620253                                      | g.178106904G>A                 | c.46-7905C>T                | intron 1 |         | A=0.0009/2                         | 1000 Genomes           |
| 396 | rs147752201                                      | g.178106891T>A                 | c.46-7892A>T                | intron 1 |         | A=0.0018/4                         | 1000 Genomes           |
| 397 | rs75661630                                       | g.178106758A>C                 | c.46-7759T>G                | intron 1 |         | C=0.0069/15                        | 1000 Genomes           |
| 398 | rs187169453                                      | g.178106736A>G                 | c.46-7737T>C                | intron 1 |         | G=0.0005/1                         | 1000 Genomes           |
| 399 | rs145683450                                      | g.178106726G>A                 | c.46-7727C>T                | intron 1 |         | A=0.0027/6                         | 1000 Genomes           |
| 400 | rs181703340                                      | g.178106335C>T                 | c.46-7336G>A                | intron 1 |         | T=0.0014/3                         | 1000 Genomes           |
| 401 | rs140260993                                      | g.178106313C>A                 | c.46-7314G>T                | intron 1 |         | A=0.0009/2                         | 1000 Genomes           |
| 402 | rs35849219                                       | g.178105996delC                | c.46-6997delG               | intron 1 |         | na                                 |                        |

|     | A                                                                                                    | B                              | C                           | D        | E       | F                                  | G                      |
|-----|------------------------------------------------------------------------------------------------------|--------------------------------|-----------------------------|----------|---------|------------------------------------|------------------------|
| 2   | ID                                                                                                   | Map on chromosome 2#/HGVS Name | Position at mRNA#/HGVS Name | Regions  | Summary | Minor Allele Frequency (MAF)/Count | MAF sources            |
| 403 | rs10803905 (rs60549745,rs12997535)                                                                   | g.178105996C>G                 | c.46-6997G>C                | intron 1 |         | C=0.4643/1014                      | 1000 Genomes           |
| 404 | rs190738455                                                                                          | g.178105970A>T                 | c.46-6971T>A                | intron 1 |         | T=0.0009/2                         | 1000 Genomes           |
| 405 | rs150511755                                                                                          | g.178105846T>C                 | c.46-6847A>G                | intron 1 |         | C=0.0046/10                        | 1000 Genomes           |
| 406 | rs142538623                                                                                          | g.178105771G>C                 | c.46-6772C>G                | intron 1 |         | C=0.0105/23                        | 1000 Genomes           |
| 407 | rs117091737                                                                                          | g.178105676A>G                 | c.46-6677T>C                | intron 1 |         | G=0.0119/26                        | 1000 Genomes           |
| 408 | rs185629218                                                                                          | g.178105597T>C                 | c.-3-6598A>G                | intron 1 |         | C=0.0005/1                         | 1000 Genomes           |
| 409 | rs148441415                                                                                          | g.178105372G>C                 | c.46-6373C>G                | intron 1 |         | C=0.0023/5                         | 1000 Genomes           |
| 410 | rs144543556                                                                                          | g.178105289A>G                 | c.46-6290T>C                | intron 1 |         | G=0.0009/2                         | 1000 Genomes           |
| 411 | rs192354298                                                                                          | g.178105169C>T                 | c.46-6170G>A                | intron 1 |         | T=0.0009/2<br>A=0.128/280          | 1000 Genomes<br>PubMed |
| 412 | rs12990527 (rs2364720,rs58288492)                                                                    | g.178105144A>G                 | c.46-6145T>C                | intron 1 |         | A=0.172/387                        | 1000 Genomes           |
| 413 | rs188188565                                                                                          | g.178105039G>T                 | c.46-6040C>A                | intron 1 |         | T=0.0023/5                         | 1000 Genomes           |
| 414 | rs183460473                                                                                          | g.1781049996C>A                | c.46-5997G>T                | intron 1 |         | A=0.0009/2                         | 1000 Genomes           |
| 415 | rs141783702                                                                                          | g.178104971C>A                 | c.46-5972G>T                | intron 1 |         | A=0.0005/1                         | 1000 Genomes           |
| 416 | rs191869222                                                                                          | g.178104833G>C                 | c.46-5834C>G                | intron 1 |         | C=0.0005/1<br>C=0.352/771          | 1000 Genomes<br>PubMed |
| 417 | rs3731799                                                                                            | g.178104760A>G                 | c.46-5761T>C                | intron 1 |         | G=0.0023/5                         | 1000 Genomes           |
| 418 | rs57941264<br>(rs66484779,rs66709457,rs66709458,r<br>s67641099,rs67641100,rs67641101,rs7<br>2411387) | g.178104678delA                | c.46-5679delT               | intron 1 |         | na                                 |                        |
| 419 | rs74901734                                                                                           | g.178104476delT                | c.46-5477delA               | intron 1 |         | na                                 |                        |
| 420 | rs112653114                                                                                          | g.178104463C>A                 | c.46-5464G>T                | intron 1 |         | na                                 |                        |
| 421 | rs138747587                                                                                          | g.178104460A>G                 | c.46-5461T>C                | intron 1 |         | G=0.0005/1                         | 1000 Genomes           |
| 422 | rs113539054                                                                                          | g.178104458C>A                 | c.46-5459G>T                | intron 1 |         | na                                 |                        |
| 423 | rs183803382                                                                                          | g.178104445T>G                 | c.46-5446A>C                | intron 1 |         | G=0.0014/3                         | 1000 Genomes           |
| 424 | rs192860219                                                                                          | g.178104106T>G                 | c.46-5107A>C                | intron 1 |         | G=0.0018/4                         | 1000 Genomes           |
| 425 | rs142680183                                                                                          | g.178104094C>G                 | c.46-5095G>C                | intron 1 |         | G=0.0037/8                         | 1000 Genomes           |
| 426 | rs188555073                                                                                          | g.178103728A>G                 | c.46-4729T>C                | intron 1 |         | G=0.0005/1                         | 1000 Genomes           |
| 427 | rs200246174                                                                                          | g.178103722_178103723delAC     | c.46-4724_46-4723delGT      | intron 1 |         | -=0.0119/26                        | 1000 Genomes           |
| 428 | rs138179678                                                                                          | g.178103617T>C                 | c.46-4618A>G                | intron 1 |         | C=0.0037/8                         | 1000 Genomes           |
| 429 | rs150404294                                                                                          | g.178103514C>T                 | c.46-4515G>A                | intron 1 |         | T=0.0037/8                         | 1000 Genomes           |
| 430 | rs183448760                                                                                          | g.178103495G>T                 | c.46-4496C>A                | intron 1 |         | T=0.0005/1                         | 1000 Genomes           |
| 431 | rs35064812                                                                                           | g.178103392_178103393insG      | c.46-4394_46-4393insC       | intron 1 |         | na                                 |                        |
| 432 | rs140498002                                                                                          | g.178103361A>G                 | c.46-4362T>C                | intron 1 |         | G=0.0005/1                         | 1000 Genomes           |
| 433 | rs148333212                                                                                          | g.178103328C>T                 | c.46-4329G>A                | intron 1 |         | T=0.0101/22                        | 1000 Genomes           |
| 434 | rs67263958(rs57309289)                                                                               | g.178103229A>G                 | c.46-4230T>C                | intron 1 |         | A=0.453/989<br>various             | 1000 Genomes<br>PubMed |
| 435 | rs34605869                                                                                           | g.178103185T>C                 | c.46-4186G>A                | intron 1 |         | C=0.0014/3                         | 1000 Genomes           |
| 436 | rs185331205                                                                                          | g.178103144C>A                 | c.-3-4145G>T                | intron 1 |         | A=0.0055/12                        | 1000 Genomes           |
| 437 | rs182296139                                                                                          | g.178103138C>T                 | c.46-4139G>A                | intron 1 |         | T=0.0005/1                         | 1000 Genomes           |
| 438 | rs191597251                                                                                          | g.178103095T>C                 | c.46-4096A>G                | intron 1 |         | C=0.0005/1<br>C=0.272/595          | 1000 Genomes<br>PubMed |
| 439 | rs186253488                                                                                          | g.178103087A>G                 | c.46-4088T>C                | intron 1 |         | G=0.0018/4                         | 1000 Genomes           |
| 440 | rs181166091                                                                                          | g.178103051T>G                 | c.46-4052A>C                | intron 1 |         | G=0.0005/1                         | 1000 Genomes           |
| 441 | rs202181500                                                                                          | g.178103008_178103010delCTG    | c.46-4011_46-4009delCAG     | intron 1 |         | -=0.0114/25                        | 1000 Genomes           |
| 442 | rs199878061                                                                                          | g.178103004_178103006delTCT    | c.46-4007_46-4005delAGA     | intron 1 |         | -=0.0114/25                        | 1000 Genomes           |
| 443 | rs143328561                                                                                          | g.178102970T>C                 | c.46-3971A>G                | intron 1 |         | C=0.0005/1                         | 1000 Genomes           |
| 444 | rs142506772                                                                                          | g.178102908G>A                 | c.46-3909C>T                | intron 1 |         | A=0.0023/5                         | 1000 Genomes           |
| 445 | rs75603023                                                                                           | g.178102697G>T                 | c.46-3698C>A                | intron 1 |         | T=0.0169/37                        | 1000 Genomes           |
| 446 | rs147723007                                                                                          | g.178102678A>G                 | c.46-3679T>C                | intron 1 |         | G=0.0009/2                         | 1000 Genomes           |
| 447 | rs191636022                                                                                          | g.178102626T>C                 | c.46-3627A>G                | intron 1 |         | C=0.0009/2<br>C=0.351/769          | 1000 Genomes<br>PubMed |
| 448 | rs2364719 (rs13025227)                                                                               | g.178102607C>T                 | c.46-3608G>A                | intron 1 |         | c=0/0                              | 1000 Genomes           |
| 449 | rs145616927                                                                                          | g.178102545C>A                 | c.46-3546G>T                | intron 1 |         | A=0.0009/2                         | 1000 Genomes           |
| 450 | rs141859565                                                                                          | g.178102285C>T                 | c.46-3286G>A                | intron 1 |         | T=0.0174/38                        | 1000 Genomes           |
| 451 | rs185698792                                                                                          | g.178102276T>A                 | c.46-3277A>T                | intron 1 |         | A=0.0009/2                         | 1000 Genomes           |
| 452 | rs10706328 (rs35093114,rs200576805)                                                                  | g.178102256delT                | c.46-3257delA               | intron 1 |         | na                                 |                        |
| 453 | rs7599604                                                                                            | g.178102203G>A                 | c.-46-3204C>T               | intron 1 |         | na                                 |                        |
| 454 | rs111241652                                                                                          | g.178102171G>C                 | c.46-3172C>G                | intron 1 |         | na                                 |                        |
| 455 | rs71421594                                                                                           | g.178102107A>G                 | c.46-3108C>T                | intron 1 |         | na                                 |                        |
| 456 | rs112551006                                                                                          | g.178102005C>A                 | c.46-3006G>T                | intron 1 |         | na                                 |                        |
| 457 | rs79628357                                                                                           | g.178101950G>A                 | c.46-2951C>T                | intron 1 |         | A=0.0362/79                        | 1000 Genomes           |
| 458 | rs181884871                                                                                          | g.178101886C>T                 | c.46-2887G>A                | intron 1 |         | T=0.0009/2                         | 1000 Genomes           |
| 459 | rs189307803                                                                                          | g.178101851G>C                 | c.46-2852C>G                | intron 1 |         | C=0.0005/1                         | 1000 Genomes           |
| 460 | rs34165498                                                                                           | g.178101845_178101846insC      | c.46-2847_46-2846insG       | intron 1 |         | na                                 |                        |
| 461 | rs2364718                                                                                            | g.178101776T>C                 | c.46-2777A>G                | intron 1 |         | C=0.0147/32                        | 1000 Genomes           |
| 462 | rs149889003                                                                                          | g.178101763C>A                 | c.46-2764G>T                | intron 1 |         | A=0.0101/22                        | 1000 Genomes           |
| 463 | rs78377016                                                                                           | g.178101561G>T                 | c.46-2562C>A                | intron 1 |         | T=0.0284/62                        | 1000 Genomes           |
| 464 | rs183761430                                                                                          | g.178101327C>A                 | c.46-2328G>T                | intron 1 |         | A=0.0014/3                         | 1000 Genomes           |
| 465 | rs78272396                                                                                           | g.178101326A>G                 | c.46-2327T>C                | intron 1 |         | G=0.0169/37                        | 1000 Genomes           |
| 466 | rs2364717 (rs13012776,rs59430539)                                                                    | g.178101235C>T                 | c.46-2236G>A                | intron 1 |         | C=0.4597/1004                      | 1000 Genomes           |
| 467 | rs78613948                                                                                           | g.178101214T>C                 | c.46-2215A>G                | intron 1 |         | C=0.027/59                         | 1000 Genomes           |

|     | A                                   | B                              | C                           | D                | E                 | F                                  | G                      |
|-----|-------------------------------------|--------------------------------|-----------------------------|------------------|-------------------|------------------------------------|------------------------|
| 2   | ID                                  | Map on chromosome 2#/HGVS Name | Position at mRNA#/HGVS Name | Regions          | Summary           | Minor Allele Frequency (MAF)/Count | MAF sources            |
| 468 | rs139085223                         | g.178101192A>G                 | c.46-2193T>C                | intron 1         |                   | G=0.0005/1                         | 1000 Genomes           |
| 469 | rs180783046                         | g.178101027T>C                 | c.46-2028A>G                | intron 1         |                   | C=0.0005/1                         | 1000 Genomes           |
| 470 | rs61232320                          | g.178100974G>T                 | c.46-1975C>A                | intron 1         |                   | T=0.0014/3                         | 1000 Genomes           |
| 471 | rs189957813                         | g.178100916T>G                 | c.46-1917A>C                | intron 1         |                   | G=0.0005/1                         | 1000 Genomes           |
| 472 | rs57557108                          | g.178100808A>G                 | c.46-1809T>C                | intron 1         |                   | G=0.0165/36                        | 1000 Genomes           |
| 473 | rs34661184                          | g.178100783_178100784insA      | c.46-1785_46-1784insT       | intron 1         |                   | na                                 |                        |
| 474 | rs184867003                         | g.178100735G>A                 | c.46-1736C>T                | intron 1         |                   | A=0.0009/2                         | 1000 Genomes           |
| 475 | rs6707261                           | g.178100543C>G                 | c.46-1544G>C                | intron 1         |                   | G+=0.0023/5                        | 1000 Genomes           |
| 476 | rs2001350§ (rs17515179,rs60883775)  | g.178100425C>T                 | c.46-1426G>A                | intron 1         |                   | C=0.146/318<br>T (various)         | 1000 Genomes<br>PubMed |
| 477 | rs139900855                         | g.178100223G>A                 | c.46-1224C>T                | intron 1         |                   | A=0.005/1                          | 1000 Genomes           |
| 478 | rs192846733                         | g.178100119C>T                 | c.46-1120G>A                | intron 1         |                   | T=0.0018/4                         | 1000 Genomes           |
| 479 | rs80192071                          | g.178100090A>G                 | c.46-1091T>C                | intron 1         |                   | G=0.0069/15                        | 1000 Genomes           |
| 480 | rs188418193                         | g.178099986T>A                 | c.46-987A>T                 | intron 1         |                   | A=0.0009/2                         | 1000 Genomes           |
| 481 | rs146003121                         | g.178099915A>G                 | c.46-916T>C                 | intron 1         |                   | G=0.0101/22                        | 1000 Genomes           |
| 482 | rs142621111                         | g.178099897C>T                 | c.46-898G>A                 | intron 1         |                   | T=0.0165/36                        | 1000 Genomes           |
| 483 | rs148494821                         | g.178099775G>A                 | c.46-776C>T                 | intron 1         |                   | A=0.0069/15                        | 1000 Genomes           |
| 484 | rs184364316                         | g.178099759G>A                 | c.46-760C>T                 | intron 1         |                   | A=0.0005/1                         | 1000 Genomes           |
| 485 | rs192698275                         | g.178099700C>T                 | c.46-701G>A                 | intron 1         |                   | T=0.0005/1<br>C=0.424/927          | 1000 Genomes<br>PubMed |
| 486 | rs144668476                         | g.178099653G>C                 | c.46-654C>G                 | intron 1         |                   | C=0.0037/8                         | 1000 Genomes           |
| 487 | rs34179691                          | g.178099615_178099616insG      | c.46-617_46-616insC         | intron 1         |                   | na                                 |                        |
| 488 | rs6433654 (rs61582684)              | g.178099612G>C, delG           | c.46-613C>G, delC           | intron 1         |                   | na                                 |                        |
| 489 | rs75402256                          | g.178099612G>C                 | c.46-613C>G                 | intron 1         |                   | G=0.4469/976                       | 1000 Genomes           |
| 490 | rs138732412                         | g.178099552G>C                 | c.46-553C>G                 | intron 1         |                   | C=0.0014/3                         | 1000 Genomes           |
| 491 | rs146476022                         | g.178099530T>A                 | c.46-531A>T                 | intron 1         |                   | A=0.0027/6                         | 1000 Genomes           |
| 492 | rs117916319                         | g.178099463T>C                 | c.46-464A>G                 | intron 1         |                   | C=0.0101/22                        | 1000 Genomes           |
| 493 | rs143918323                         | g.178099438T>C                 | c.46-439A>G                 | intron 1         |                   | C=0.0005/1                         | 1000 Genomes           |
| 494 | rs138440396                         | g.178099333T>C                 | c.46-334A>G                 | intron 1         |                   | C=0.0037/8                         | 1000 Genomes           |
| 495 | rs187866790                         | g.178099260G>A                 | c.46-261C>T                 | intron 1         |                   | A=0.0005/1                         | 1000 Genomes           |
| 496 | rs147100319                         | g.178099185C>A                 | c.46-186G>T                 | intron 1         |                   | A=0.0005/1                         | 1000 Genomes           |
| 497 | rs201921480                         | g.178099003T>C                 | c.46-4A>G                   | intron 1         |                   | C=0/0                              | 1000 Genomes           |
| 498 | rs182428269                         | g.178098918G>A                 | c.127C>T                    | exon 2/mRNA 682  | Cns (p.Arg43Trp)  | A=0.0005/1                         | 1000 Genomes           |
| 499 | rs35248500                          | g.178098917C>T                 | c.128G>A                    | exon 2/mRNA 683  | Cns (p.Arg43Gln)  | T=0.006/13                         | 1000 Genomes           |
| 500 | rs1135118                           | g.178098831C>T                 | c.214G>A                    | exon 2/mRNA 769  | Cns (p.Ala72Thr)  | na                                 | PubMed                 |
| 501 | rs199691660                         | g.178098829A>T                 | c.216T>A                    | exon 2/mRNA 771  | Cs (p.Ala72=)     | na                                 |                        |
| 502 |                                     | g.178098757C>                  | c.288G>                     | exon 2/mRNA 831  | Cns (p.Thr92Ile)  | na                                 | PubMed                 |
| 503 | rs5031039                           | g.178098750A>G                 | c.295T>C                    | exon 2/mRNA 850  | Cns (p.Ser99Pro)  | G=0                                | PubMed                 |
| 504 | rs114377436                         | g.178098722G>A                 | c.312+11C>T                 | intron 2         |                   | A=0.0069/15                        | 1000 Genomes           |
| 505 | rs78088214                          | g.178098679C>T                 | c.312+54G>A                 | intron 2         |                   | T=0.0238/52                        | 1000 Genomes           |
| 506 | rs151335115                         | g.178098660C>T                 | c.312+73G>A                 | intron 2         |                   | T=0.0101/22                        | 1000 Genomes           |
| 507 | rs77817284                          | g.178098565A>C                 | c.312+168T>G                | intron 2         |                   | C=0.0009/2                         | 1000 Genomes           |
| 508 | rs143434001                         | g.178098562C>G                 | c.312+171G>C                | intron 2         |                   | G=0.0005/1                         | 1000 Genomes           |
| 509 | rs148816783                         | g.178098502G>T                 | c.312+231C>A                | intron 2         |                   | T=0.0101/22                        | 1000 Genomes           |
| 510 | rs145469719                         | g.178098463G>A                 | c.312+270C>T                | intron 2         |                   | A=0.0005/1                         | 1000 Genomes           |
| 511 | rs7604429                           | g.178098454C>G                 | c.312+279G>C                | intron 2         |                   | G=0.0014/3                         | 1000 Genomes           |
| 512 | rs190854564                         | g.178098430G>T                 | c.312+303C>A                | intron 2         |                   | T=0.0018/4                         | 1000 Genomes           |
| 513 | rs7604306                           | g.178098310C>T                 | c.313-243G>A                | intron 2         |                   | T=0.0018/4                         | 1000 Genomes           |
| 514 | rs187729729                         | g.178098092G>A                 | c.313-25C>T                 | intron 2         |                   | A=0.0027/6                         | 1000 Genomes           |
| 515 | rs139080704 (rs148365874)           | g.178098088delA                | c.313-21delT                | intron 2         |                   | =0.0765/167                        | 1000 Genomes           |
| 516 | rs200239262                         | g.178098017C>G                 | c.363G>C                    | exon 3/mRNA 918  | Cns (p.Gln121His) | na                                 |                        |
| 517 | rs183034165                         | g.178098008T>C                 | c.372G>A                    | exon 3/mRNA 927  | Cs (p.Ala124=)    | T=0.0009/2<br>T=0.006              | 1000 Genomes<br>PubMed |
| 518 | rs199970826                         | g.178097996C>T                 | c.384G>A                    | exon 3/mRNA 939  | Cs (p.Pro128=)    | T=0.0005/1                         | 1000 Genomes           |
| 519 | rs191231706                         | g.178097965T>C                 | c.402+13A>G                 | intron 3         |                   | C=0.0005/1<br>G=0.271/592          | 1000 Genomes<br>PubMed |
| 520 | rs57572550                          | g.178097792T>C                 | c.402+186A>G                | intron 3         |                   | C=0.0092/20                        | 1000 Genomes           |
| 521 | rs10183914§ (rs58731187,rs61374844) | g.178097666C>T                 | c.402+312G>A                | intron 3         |                   | T=0.2564/560<br>T=0.536/188        | 1000 Genomes<br>PubMed |
| 522 | rs146485862                         | g.178097587C>G                 | c.403-276G>C                | intron 3         |                   | G=0.0069/15                        | 1000 Genomes           |
| 523 | rs115297462                         | g.178097545G>A                 | c.403-234C>T                | intron 3         |                   | A=0.0018/4                         | 1000 Genomes           |
| 524 | rs200643669                         | g.178097346C>T                 | c.403-35G>A                 | intron 3         |                   | T=0.0005/1                         | 1000 Genomes           |
| 525 | rs200686306                         | g.178097321A>G                 | c.403-10T>C                 | intron 3         |                   | G=0.0005/1                         | 1000 Genomes           |
| 526 | rs201992337                         | g.178097260C>T                 | c.454G>A                    | exon 4/mRNA 1009 | Cns (p.Glu152Lys) | na                                 |                        |
| 527 | rs201589693                         | g.178097251C>T                 | c.463G>A                    | exon 4/mRNA 1018 | Cns (p.Val155Ile) | T=0.0005/1                         | 1000 Genomes           |
| 528 | rs35577826                          | g.178097185A>C                 | c.529T>G                    | exon 4/mRNA 1084 | Cns (p.Leu177Val) | C=0.0014/3<br>A<0.005              | 1000 Genomes<br>PubMed |
| 529 | rs80155840                          | g.178097091T>A                 | c.594+29A>T                 | intron 4         |                   | na                                 |                        |
| 530 | rs75782703                          | g.178097090A>T                 | c.594+30T>A                 | intron 4         |                   | na                                 |                        |
| 531 | rs115871724                         | g.178096839T>G                 | c.595-103A>C                | intron 4         |                   | G=0.0064/14                        | 1000 Genomes           |
| 532 | rs144119724                         | g.178096837T>A                 | c.595-101A>T                | intron 4         |                   | A=0.0018/4                         | 1000 Genomes           |
| 533 | rs181513314                         | g.178096710C>T                 | c.621G>A                    | exon 5/mRNA1176  | Cn (p.Leu207=)    | T=0.0005/1                         | 1000 Genomes           |
| 534 | rs60132461                          | g.178096675T>C                 | c.656A>G                    | exon 5/mRNA 1211 | Cns (p.Lys219Arg) | C=0.0018/4                         | 1000 Genomes           |



|     | A                        | B                                     | C                           | D                | E                  | F                                  | G                      |
|-----|--------------------------|---------------------------------------|-----------------------------|------------------|--------------------|------------------------------------|------------------------|
| 2   | ID                       | Map on chromosome 2*/HGVS Name        | Position at mRNA*/HGVS Name | Regions          | Summary            | Minor Allele Frequency (MAF)/Count | MAF sources            |
| 535 | rs139187151              | g.178096634G>A                        | c.697C>T                    | exon 5/mRNA 1252 | Cns (p.Pro233Ser)  | A=0.0005/1<br>A=0.0012             | 1000 Genomes<br>PubMed |
| 536 | rs35557421               | g.178096620delT                       | c.711delA                   | exon 5/mRNA 1266 | Cs (p.Glu237=fs)   | na                                 |                        |
| 537 | rs34154613               | g.178096529C>T                        | c.802G>A                    | exon 5/mRNA 1357 | Cns(p.Val268Met)   | T=0.0018/4                         | 1000 Genomes           |
| 538 | rs141363120              | g.178096406G>A                        | c.925C>T                    | exon 5/mRNA 1480 | Cns (p.Leu309Phe)  | A=0.0037/8                         | 1000 Genomes           |
| 539 | rs201661476              | g.178096380A>C                        | c.951T>G                    | exon 5/mRNA 1506 | Cns (p.Ile2317Met) | na                                 |                        |
| 540 | rs199673454              | g.178096309T>A                        | c.1022A>T                   | exon 5/mRNA 1577 | Cns (p.Asp341Val)  | A=0.0005/1                         | 1000 Genomes           |
| 541 | rs35007548               | g.178096299G>A                        | c.1032C>T                   | exon 5/mRNA 1587 | Cs (p.Ser344=)     | A=0.0009/2                         | 1000 Genomes           |
| 542 | rs200209692              | g.178096287T>C                        | c.1044A>G                   | exon 5/mRNA 1599 | Cs (p.Leu348=)     | C=0.0005/1                         | 1000 Genomes           |
| 543 | -                        | g.178096237C>A                        | c.1094G>T                   | exon 5/mRNA 1649 | Cns (p.Ser365Ile)  | A=0.125/273<br>A=0.006             | PubMed                 |
| 544 | rs201214197              | g.178096171C>T                        | c.1160G>A                   | exon 5/mRNA 1715 | Cns (p.Ser387Asn)  | T=0.0005/1                         | 1000 Genomes           |
| 545 | rs200494292              | g.178096165T>C                        | c.1166A>G                   | exon 5/mRNA 1721 | Cns (p.Lys389Arg)  | na                                 |                        |
| 546 | rs186171287              | g.178096115G>A                        | c.1216C>T                   | exon 5/mRNA 1771 | Cns (p.Pro406Ser)  | A=0.0005/1                         | 1000 Genomes           |
| 547 | rs182276775              | g.178096062C>A                        | c.1269G>T                   | exon 5/mRNA 1824 | Cns (p.Glu423Asp)  | A=0.0005/1                         | 1000 Genomes           |
| 548 | rs201560221              | g.178096048T>C                        | c.1283A>G                   | exon 5/mRNA 1838 | Cns (p.Lys428Arg)  | na                                 |                        |
| 549 | rs189238236              | g.178096043A>G                        | c.1288T>C                   | exon 5/mRNA 1843 | Cs (p.Leu430=)     | G=0.0005/1                         | 1000 Genomes           |
| 550 | rs184287392              | g.178096022G>A                        | c.1309C>T                   | exon 5/mRNA 1864 | Cns (p.Arg437Trp)  | A=0.0005/1                         | 1000 Genomes           |
| 551 | rs201871588              | g.178095986G>A                        | c.1345C>T                   | exon 5/mRNA 1900 | Cns (p.Arg449Cys)  | na                                 |                        |
| 552 | rs181294188              | g.178095985T>C                        | c.1346G>A                   | exon 5/mRNA 1901 | Cns (p.Arg449His)  | T=0.0009/2                         | 1000 Genomes           |
| 553 | rs201690466              | g.178095973T>A                        | c.1358A>T                   | exon 5/mRNA 1913 | Cns (p.His453Leu)  | A=0.0005/1                         | 1000 Genomes           |
| 554 | rs1057044 (rs52789869)   | g.178095781C>T                        | c.1550G>A                   | exon 5/mRNA 2105 | Cns (p.Arg517Lys)  | na                                 | PubMed                 |
| 555 | rs200750800              | g.178095603A>G                        | c.1728T>C                   | exon 5/mRNA 2283 | Cs (p.Tyr576=)     | na                                 |                        |
| 556 | rs200175942              | g.178095567A>G                        | c.1764T>C                   | exon 5/mRNA 2319 | Cs (p.Asp588=)     | G=0.0005/1                         | 1000 Genomes           |
| 557 | rs77547666               | g.178095495G>C                        | c.*18C>G                    | exon 5 (UTR-3')  | mRNA 2391          | C=0.0069/15                        | 1000 Genomes           |
| 558 | rs73031353               | g.178095425T>C                        | c.*88A>G                    | exon 5 (UTR-3')  | mRNA 2461          | C=0.0018/4                         | 1000 Genomes           |
| 559 | rs6759443                | g.178095345T>C                        | c.*168A>G                   | exon 5 (UTR-3')  | mRNA 2541          | C=0.0041/9                         | 1000 Genomes           |
| 560 | rs188674558              | g.178095279C>A                        | c.*234G>T                   | exon 5 (UTR-3')  | mRNA 2607          | A=0.0005/1                         | 1000 Genomes           |
| 561 | rs77685897               | g.178095247A>G                        | c.*266T>C                   | exon 5 (UTR-3')  | mRNA 2639          | G=0.0009/2                         | 1000 Genomes           |
| 562 | rs1057092                | g.178095162T>G                        | c.*351A>C                   | exon 5 (UTR-3')  | mRNA 2724          | na                                 |                        |
| 563 | rs3197704                | g.178095162T>G                        | c.*351A>C                   | exon 5 (UTR-3')  | mRNA 2724          | na                                 |                        |
| 564 | rs184701151              | g.178095159T>C                        | c.*354A>G                   | exon 5 (UTR-3')  | mRNA 2727          | C=0.0027/6                         | 1000 Genomes           |
| 565 | rs11543307               | g.178095153A>G                        | c.*360T>C                   | exon 5 (UTR-3')  | mRNA 2733          | na                                 |                        |
| 566 | rs111874043              | g.178095146A>G                        | c.*367T>C                   | exon 5 (UTR-3')  | mRNA 2740          | na                                 |                        |
| 567 | rs34012004               | g.178095102A>C                        | c.*411T>G                   | exon 5 (UTR-3')  | mRNA 2784          | C=0.071                            | PubMed                 |
| 568 | rs201481890              | g.178095090_178095091insT             | c.*422_*423insA             | exon 5 (UTR-3')  | mRNA 2795-2796     | na                                 |                        |
| 569 | rs3082500                | g.178095089_178095090delTT, delTTinsT | c.*423_*424delAAinsA        | exon 5 (UTR-3')  | mRNA 2796-2797     | na                                 |                        |
| 570 | rs71792546 (rs71796710)  | g.178095079delT                       | c.*425delA                  | exon 5 (UTR-3')  | mRNA 2798          | na                                 |                        |
| 571 | rs1057106                | g.178095078A>C, A>T                   | c.*435T>A, T>G              | exon 5 (UTR-3')  | mRNA 2808          | na                                 |                        |
| 572 | rs34176791               | g.178095076A>C                        | c.*437T>G                   | exon 5 (UTR-3')  | mRNA 2810          | C=0.0023/5                         | 1000 Genomes           |
| 573 | rs35911553               | g.178095045C>T                        | c.*468G>A                   | exon 5 (UTR-3')  | mRNA 2841          | T=0.0069/15                        | 1000 Genomes           |
| 574 | rs144190519              | g.178095001delTG                      | c.*482+30_*482+31delCA      | 3'flanking       |                    | -=0.0238/52                        | 1000 Genomes           |
| 575 | rs34261474               | g.178094967_178094968insC             | c.*482+63_*482+64insG       | 3'flanking       |                    | na                                 |                        |
| 576 | rs11370732 (rs144540636) | g.178094964_178094965insC             | c.*480+68_*480+69insG       | 3'flanking       |                    | C=0.0114/25                        | 1000 Genomes           |
| 577 | rs199663976              | g.178094874A>T                        | c.*482+157T>A               | 3'flanking       |                    | na                                 |                        |
| 578 | rs147246052              | g.178094764G>A                        | c.*482+267C>T               | 3'flanking       |                    | A=0.0014/3                         | 1000 Genomes           |
| 579 | rs80324085               | g.178094714G>A                        | c.*482+317C>T               | 3'flanking       |                    | A=0.0018/4                         | 1000 Genomes           |
| 580 | rs7603691                | g.178094622T>C                        | c.*482+409A>G               | 3'flanking       |                    | C=0.0018/4                         | 1000 Genomes           |
| 581 | rs138431904              | g.178094611A>G                        | c.*482+420T>C               | 3'flanking       |                    | G=0.0018/4                         | 1000 Genomes           |
| 582 | rs114146942              | g.178094572G>A                        | c.*482+459C>T               | 3'flanking       |                    | A=0.0238/52                        | 1000 Genomes           |
| 583 | rs78677742               | g.178094564C>T                        | c.*482+467G>A               | 3'flanking       |                    | T=0.005/11                         | 1000 Genomes           |
| 584 | rs2706110                | g.178092162T>C                        |                             | 3'flanking       |                    | na                                 | PubMed                 |
| 585 | rs13035806               | g.178091822G>A                        |                             | 3'flanking       |                    | A=0.124/272                        | 1000 Genomes           |
| 586 | rs2588882                | g.178087165G>T                        |                             | 3'flanking       |                    | na                                 | PubMed                 |

Supplementary Table S2. Mouse *Nr2f2* genetic sequence variation.

| ID          | Ch2 bp Location | Gene          | Distance (gene) | Distance (mRNA) | Region     | Alleles (genome) | Consequence | C57BL/6J | 129S1/SvJ | A/J | AKR/J | BALB/cJ | C3H/HeJ | C57BL/6N J | CAST/EiJ | CBA/J | DBA/2J | FVB/NJ | LP/J | NOD/ShiL tJ | NZO/HILtJ | PWK/PhJ | SPRET/EiJ | WSB/EiJ |
|-------------|-----------------|---------------|-----------------|-----------------|------------|------------------|-------------|----------|-----------|-----|-------|---------|---------|------------|----------|-------|--------|--------|------|-------------|-----------|---------|-----------|---------|
| rs230809422 | 75709621        | E030042O20Rik | 4980            | -4980           | 5'flanking | C/T              | NC          | T        | T         | T   | T     | T       | T       | T          | C        | T     | T      | T      | T    | T           | T         | T       | T         | T       |
| rs255224698 | 75709614        | E030042O20Rik | 4973            | -4973           | 5'flanking | A/G              | NC          | A        | A         | A   | A     | A       | A       | A          | A        | A     | A      | A      | A    | A           | A         | A       | A         | A       |
| rs240249171 | 75709613        | E030042O20Rik | 4972            | -4972           | 5'flanking | C/T              | NC          | C        | C         | C   | C     | C       | C       | C          | C        | C     | C      | C      | C    | C           | C         | C       | C         | C       |
| rs226991224 | 75709598        | E030042O20Rik | 4957            | -4957           | 5'flanking | A/G              | NC          | G        | G         | G   | G     | G       | G       | G          | G        | G     | G      | G      | G    | G           | G         | G       | G         | G       |
| rs33255540  | 75709516        | E030042O20Rik | 4875            | -4875           | 5'flanking | A/G              | NC          | G        | A         | A   | G     | A       | A       | G          | G        | A     | A      | G      | A    | G           | A         | G       | A         | G       |
| rs247536675 | 75709480        | E030042O20Rik | 4839            | -4839           | 5'flanking | C/T              | NC          | C        | C         | C   | C     | C       | C       | C          | C        | C     | C      | C      | C    | C           | C         | C       | C         | C       |
| rs221147315 | 75709474        | E030042O20Rik | 4833            | -4833           | 5'flanking | G/T              | NC          | G        | G         | G   | G     | G       | G       | G          | G        | G     | G      | G      | G    | G           | G         | G       | G         | G       |
| rs255873241 | 75709455        | E030042O20Rik | 4814            | -4814           | 5'flanking | A/G              | NC          | G        | G         | G   | G     | G       | G       | G          | A        | G     | G      | G      | G    | G           | G         | G       | G         | G       |
| rs247277782 | 75709424        | E030042O20Rik | 4783            | -4783           | 5'flanking | C/G              | NC          | G        | G         | G   | G     | G       | G       | G          | C        | G     | G      | G      | G    | G           | G         | G       | G         | G       |
| rs219830336 | 75709421        | E030042O20Rik | 4780            | -4780           | 5'flanking | A/G              | NC          | G        | G         | G   | G     | G       | G       | G          | G        | G     | G      | G      | G    | G           | G         | G       | A         | G       |
| rs257294435 | 75709420        | E030042O20Rik | 4779            | -4779           | 5'flanking | C/T              | NC          | T        | T         | T   | T     | T       | T       | T          | C        | T     | T      | T      | T    | C           | T         | C       | C         | C       |
| rs234599241 | 75709176        | E030042O20Rik | 4535            | -4535           | 5'flanking | A/G              | I           | G        | G         | G   | G     | G       | G       | G          | G        | G     | G      | G      | G    | G           | G         | G       | A         | G       |
| rs237178090 | 75709152        | E030042O20Rik | 4511            | -4511           | 5'flanking | C/T              | I           | C        | C         | C   | C     | C       | C       | C          | C        | C     | C      | C      | C    | C           | C         | C       | C         | T       |
| rs264066598 | 75709124        | E030042O20Rik | 4483            | -4483           | 5'flanking | C/T              | I           | T        | T         | T   | T     | T       | T       | T          | T        | T     | T      | T      | T    | T           | T         | T       | C         | T       |
| rs239177899 | 75709120        | E030042O20Rik | 4479            | -4479           | 5'flanking | A/G              | I           | A        | A         | A   | A     | A       | A       | A          | A        | A     | A      | A      | A    | A           | A         | A       | A         | A       |
| rs29868165  | 75709012        | E030042O20Rik | 4371            | -4371           | 5'flanking | A/G              | I           | A        | G         | G   | A     | G       | A       | A          | G        | A     | A      | A      | A    | G           | A         | G       | G         | G       |
| rs249142851 | 75709011        | E030042O20Rik | 4370            | -4370           | 5'flanking | C/T              | I           | C        | C         | C   | C     | C       | C       | C          | C        | C     | C      | C      | C    | C           | C         | C       | C         | C       |
| rs243227340 | 75709003        | E030042O20Rik | 4362            | -4362           | 5'flanking | A/G              | I           | G        | G         | G   | G     | G       | G       | G          | G        | G     | G      | G      | G    | A           | G         | A       | G         | A       |
| rs213568400 | 75708971        | E030042O20Rik | 4330            | -4330           | 5'flanking | C/T              | I           | T        | T         | T   | T     | T       | T       | T          | T        | T     | T      | T      | T    | T           | T         | T       | C         | T       |
| rs245869742 | 75708881        | E030042O20Rik | 4240            | -4240           | 5'flanking | C/T              | I           | T        | T         | T   | T     | T       | T       | T          | T        | T     | T      | T      | T    | T           | T         | C       | T         | T       |
| rs226690726 | 75708854        | E030042O20Rik | 4213            | -4213           | 5'flanking | C/T              | I           | T        | T         | T   | T     | T       | T       | T          | T        | T     | T      | T      | T    | T           | T         | T       | C         | T       |
| rs260067802 | 75708817        | E030042O20Rik | 4176            | -4176           | 5'flanking | C/T              | I           | C        | C         | C   | C     | C       | C       | C          | C        | C     | C      | C      | C    | C           | C         | C       | C         | C       |
| rs250341742 | 75708706        | E030042O20Rik | 4065            | -4065           | 5'flanking | A/T              | I           | A        | A         | A   | A     | A       | A       | A          | A        | A     | A      | A      | A    | A           | A         | A       | A         | A       |
| rs228899359 | 75708700        | E030042O20Rik | 4059            | -4059           | 5'flanking | A/G              | I           | A        | A         | A   | A     | A       | A       | A          | A        | A     | A      | A      | A    | A           | A         | A       | A         | A       |
| rs264666949 | 75708655        | E030042O20Rik | 4014            | -4014           | 5'flanking | A/G              | I           | G        | G         | G   | G     | G       | G       | G          | G        | G     | G      | G      | G    | G           | G         | A       | G         | A       |
| rs244676293 | 75708654        | E030042O20Rik | 4013            | -4013           | 5'flanking | C/T              | I           | T        | T         | T   | T     | T       | T       | T          | T        | T     | T      | T      | T    | T           | T         | C       | T         | T       |
| rs50763314  | 75708597        | E030042O20Rik | 3956            | -3956           | 5'flanking | C/G              | I           | C        | C         | C   | C     | C       | C       | C          | C        | C     | C      | C      | C    | C           | C         | C       | G         | C       |
| rs219885776 | 75708592        | E030042O20Rik | 3951            | -3951           | 5'flanking | C/G/T            | I           | T        | T         | T   | T     | T       | T       | T          | C        | T     | T      | T      | T    | T           | T         | T       | T         | T       |
| rs33051362  | 75708450        | E030042O20Rik | 3809            | -3809           | 5'flanking | G/T              | I           | T        | G         | G   | T     | G       | G       | T          | G        | G     | G      | T      | G    | G           | G         | G       | G         | G       |
| rs240796647 | 75708422        | E030042O20Rik | 3781            | -3781           | 5'flanking | C/T              | I           | C        | C         | C   | C     | C       | C       | C          | C        | C     | C      | C      | C    | C           | C         | C       | C         | C       |
| rs223681637 | 75708244        | E030042O20Rik | 3603            | -3603           | 5'flanking | C/T              | I           | T        | T         | T   | T     | T       | T       | T          | T        | T     | T      | T      | T    | T           | T         | T       | C         | T       |
| rs260734210 | 75708243        | E030042O20Rik | 3602            | -3602           | 5'flanking | G/T              | I           | T        | T         | T   | T     | T       | T       | T          | T        | T     | T      | T      | T    | T           | T         | T       | T         | T       |
| rs241799886 | 75708217        | E030042O20Rik | 3576            | -3576           | 5'flanking | C/T              | I           | C        | C         | C   | C     | C       | C       | C          | C        | C     | C      | C      | C    | C           | C         | C       | C         | C       |
| rs212540446 | 75708209        | E030042O20Rik | 3568            | -3568           | 5'flanking | C/T              | I           | T        | T         | T   | T     | T       | T       | T          | T        | T     | T      | T      | T    | T           | T         | T       | C         | T       |
| rs260621619 | 75708149        | E030042O20Rik | 3508            | -3508           | 5'flanking | A/T              | I           | A        | A         | A   | A     | A       | A       | A          | A        | A     | A      | A      | A    | A           | A         | A       | A         | A       |
| rs231801047 | 75708145        | E030042O20Rik | 3504            | -3504           | 5'flanking | C/T              | I           | C        | C         | C   | C     | C       | C       | C          | C        | C     | C      | C      | C    | C           | C         | C       | C         | C       |
| rs213630694 | 75708138        | E030042O20Rik | 3497            | -3497           | 5'flanking | A/G              | I           | G        | G         | G   | G     | G       | G       | G          | G        | G     | G      | G      | G    | G           | G         | A       | G         | A       |
| rs245929997 | 75708137        | E030042O20Rik | 3496            | -3496           | 5'flanking | A/G              | I           | G        | G         | G   | G     | G       | G       | G          | G        | G     | G      | G      | G    | G           | G         | A       | G         | A       |
| rs226749174 | 75708115        | E030042O20Rik | 3474            | -3474           | 5'flanking | G/T              | I           | T        | T         | T   | T     | T       | T       | T          | T        | T     | T      | T      | T    | T           | T         | G       | T         | T       |
| rs218909371 | 75708045        | E030042O20Rik | 3404            | -3404           | 5'flanking | C/T              | I           | T        | T         | T   | T     | T       | T       | T          | T        | T     | T      | T      | T    | T           | T         | T       | C         | T       |
| rs254123930 | 75707907        | E030042O20Rik | 3266            | -3266           | 5'flanking | C/T              | I           | C        | C         | C   | C     | C       | C       | C          | C        | C     | C      | C      | C    | C           | C         | C       | C         | C       |
| rs229438622 | 75707710        | E030042O20Rik | 3069            | -3069           | 5'flanking | C/T              | I           | C        | C         | C   | C     | C       | C       | C          | C        | C     | C      | C      | C    | C           | C         | C       | C         | C       |
| rs261595945 | 75707695        | E030042O20Rik | 3054            | -3054           | 5'flanking | A/G              | I           | G        | G         | G   | G     | G       | G       | G          | G        | G     | G      | G      | G    | G           | G         | A       | G         | A       |
| rs256370335 | 75707685        | E030042O20Rik | 3044            | -3044           | 5'flanking | A/T              | I           | T        | T         | T   | T     | T       | T       | T          | T        | T     | T      | T      | T    | T           | T         | A       | T         | A       |
| rs225800735 | 75707627        | E030042O20Rik | 2986            | -2986           | 5'flanking | C/T              | I           | T        | T         | T   | T     | T       | T       | T          | T        | T     | T      | T      | T    | T           | T         | C       | T         | T       |
| rs260304414 | 75707610        | E030042O20Rik | 2969            | -2969           | 5'flanking | C/G              | I           | G        | G         | G   | G     | G       | G       | G          | G        | G     | G      | G      | G    | G           | G         | G       | C         | G       |
| rs240859579 | 75707591        | E030042O20Rik | 2950            | -2950           | 5'flanking | A/G              | I           | G        | G         | G   | G     | G       | G       | G          | G        | G     | G      | G      | G    | G           | G         | A       | G         | A       |
| rs247435176 | 75707572        | E030042O20Rik | 2931            | -2931           | 5'flanking | C/T              | I           | T        | T         | T   | T     | T       | T       | T          | C        | T     | T      | T      | T    | T           | C         | T       | C         | C       |
| rs265995066 | 75707537        | E030042O20Rik | 2896            | -2896           | 5'flanking | C/T              | I           | T        | T         | T   | T     | T       | T       | T          | T        | T     | T      | T      | T    | T           | T         | T       | C         | T       |
| rs247215518 | 75707514        | E030042O20Rik | 2873            | -2873           | 5'flanking | G/T              | I           | G        | G         | G   | G     | G       | G       | G          | G        | G     | G      | G      | G    | G           | G         | T       | G         | G       |
| rs220803614 | 75707513        | E030042O20Rik | 2872            | -2872           | 5'flanking | C/T              | I           | T        | T         | T   | T     | T       | T       | T          | T        | T     | T      | T      | T    | T           | T         | T       | C         | T       |
| rs33595806  | 75707504        | E030042O20Rik | 2863            | -2863           | 5'flanking | C/T              | I           | C        | T         | T   | C     | T       | T       | T          | T        | T     | T      | T      | T    | T           | T         | T       | T         | T       |
| rs231859891 | 75707491        | E030042O20Rik | 2850            | -2850           | 5'flanking | A/C              | I           | A        | A         | A   | A     | A       | A       | A          | A        | A     | A      | A      | A    | A           | A         | A       | A         | A       |
| rs263410910 | 75707478        | E030042O20Rik | 2837            | -2837           | 5'flanking | A/C              | I           | A        | A         | A   | A     | A       | A       | A          | C        | A     | A      | A      | A    | A           | C         | A       | C         | C       |
| rs32828299  | 75707404        | E030042O20Rik | 2763            | -2763           | 5'flanking | A/G              | I           | A        | G         | G   | A     | G       | A       | G          | A        | G     | A      | A      | A    | G           | G         | A       | G         | A       |
| rs232815688 | 75707385        | E030042O20Rik | 2744            | -2744           | 5'flanking | G/T              | I           | T        | T         | T   | T     | T       | T       | T          | T        | T     | T      | T      | T    | T           | T         | T       | G         | T       |
| rs219058923 | 75707337        | E030042O20Rik | 2696            | -2696           | 5'flanking | A/T              | I           | T        | T         | T   | T     | T       | T       | T          | T        | T     | T      | T      | T    | T           | T         | A       | T         | T       |
| rs27978297  | 75707281        | E030042O20Rik | 2640            | -2640           | 5'flanking | C/T              | I           | T        | T         | T   | T     | T       | T       | T          | T        | T     | T      | T      | T    | T           | T         | C       | T         | T       |
| rs27978298  | 75707263        | E030042O20Rik | 2622            | -2622           | 5'flanking | C/T              | I           | C        | C         | C   | C     | C       | C       | C          | C        | C     | C      | C      | C    | C           | C         | C       | C         | C       |
| rs257363084 | 75707231        | E030042O20Rik | 2590            | -2590           | 5'flanking | A/T              | I           | A        | A         | A   | A     | A       | A       | A          | T        | A     | A      | A      | A    | A           | T         | A       | A         | T       |
| rs245853837 | 75707183        | E030042O20Rik | 2542            | -2542           | 5'flanking | G/T              | I           | T        | T         | T   | T     | T       | T       | T          | T        | T     | T      | T      | T    | T           | T         | G       | T         | A       |
| rs225868145 | 75707172        | E030042O20Rik | 2531            | -2531           | 5'flanking | A/T              | I           | A        | A         | A   | A     | A       | A       | A          | A        | A     | A      | A      | A    | A           | A         | A       | A         | T       |
| rs259982121 | 75707150        | E030042O20Rik | 2509            | -2509           | 5'flanking | C/G              | I           | G        | G         | G   | G     | G       | G       | G          | G        | G     | G      | G      | G    | G           | G         | G       | C         | G       |
| rs246896451 | 75707139        | E030042O20Rik | 2498            | -2498           | 5'flanking | A/G              | I           | G        | G         | G   | G     | G       | G       | G          | G        | G     | G      | G      | G    | G           | G         | A       | G         | G       |
| rs235728646 | 75707132        | E030042O20Rik | 2491            | -2491           | 5'flanking | C/T              | I           | C        | C         | C   | C     | C       | C       | C          | C        | C     | C      | C      | C    | C           | C         | C       | C         | C       |
| rs264187040 | 75706924        | E030042O20Rik | 2283            | -2283           | 5'flanking | A/G              | I           | A        | A         | A   | A     | A       | A       | A          | A        | A     | A      | A      | A    | A           | A         | A       | A         | A       |
| rs27978299  | 75706892        | E030042O20Rik | 2251            | -2251           | 5'flanking | G/T              | I           | G        | A         | G   | G     | G       | G       | G          | T        | G     | G      | A      | A    | A           | G         | A       | G         | G       |
| rs27978300  | 75706861        | E030042O20Rik | 2220            | -2220           | 5'flanking | A/G              | I           | G        | G         | G   | G     | G       | G       | G          | G        | G     | G      | G      | G    | G           | G         | A       | G         | G       |

| D                       | Ch2 bp Location   | Gene          | Distance (gene) | Distance (mRNA) | Region     | Alleles (genome)     | Consequence | C57BL/6J     | 129S1/Svl mJ | A/J | AKR/J | BALB/cJ | C3H/HeJ | C57BL/6N J | CAST/EIJ | CBA/J | DBA/2J | FVB/NJ | LP/J | NOD/ShiL tJ | NZO/HILZ | PWK/PHJ | SPRET/EIJ | WSB/EIJ |   |
|-------------------------|-------------------|---------------|-----------------|-----------------|------------|----------------------|-------------|--------------|--------------|-----|-------|---------|---------|------------|----------|-------|--------|--------|------|-------------|----------|---------|-----------|---------|---|
| rs27978301              | 75706760          | E030042O20Rik | 2119            | -2119           | 5'flanking | A/T                  | I           | T            | T            | T   | T     | T       | T       | T          | T        | T     | T      | T      | T    | A           | T        | T       | T         | A       |   |
| rs238139731             | 75706739          | E030042O20Rik | 2098            | -2098           | 5'flanking | A/G                  | I           | G            | G            | G   | G     | G       | G       | G          | A        | G     | G      | G      | G    | G           | G        | G       | G         | G       | A |
| rs219122423             | 75706732          | E030042O20Rik | 2091            | -2091           | 5'flanking | C/G                  | I           | G            | G            | G   | G     | G       | G       | G          | G        | G     | G      | G      | G    | G           | G        | G       | G         | C       | G |
| rs27978302              | 75706721          | E030042O20Rik | 2080            | -2080           | 5'flanking | A/G                  | I           | A            | A            | A   | A     | A       | A       | A          | G        | A     | A      | A      | A    | A           | G        | A       | A         | G       | G |
| rs27978303              | 75706591          | E030042O20Rik | 1950            | -1950           | 5'flanking | C/T                  | I           | C            | C            | C   | C     | C       | C       | C          | C        | C     | C      | C      | C    | C           | C        | C       | C         | C       | C |
| rs227131200             | 75706486          | E030042O20Rik | 1845            | -1845           | 5'flanking | A/T                  | I           | T            | T            | T   | T     | T       | T       | T          | T        | T     | T      | T      | T    | T           | T        | T       | T         | A       | T |
| rs33316784              | 75706455          | E030042O20Rik | 1814            | -1814           | 5'flanking | A/T                  | I           | T            | A            | A   | T     | A       | A       | T          | A        | A     | A      | T      | A    | A           | A        | A       | A         | A       | A |
| rs27978304              | 75706387          | E030042O20Rik | 1746            | -1746           | 5'flanking | C/T                  | I           | C            | C            | C   | C     | C       | C       | C          | T        | A     | C      | C      | C    | C           | T        | C       | T         | C       | T |
| rs27978305              | 75706326          | E030042O20Rik | 1685            | -1685           | 5'flanking | C/G                  | I           | G            |              |     |       |         |         |            |          |       |        |        |      |             |          |         |           |         |   |
| rs266000646             | 75706320-75706321 | E030042O20Rik | 1680-1679       | -1680-1679      | 5'flanking | AAAC add             | I           | AA           |              |     |       |         |         |            |          |       |        |        |      |             |          |         |           |         |   |
| rs218612804             | 75706311          | E030042O20Rik | 1670            | -1670           | 5'flanking | T del                | I           | T            |              |     |       |         |         |            |          |       |        |        |      |             |          |         |           |         |   |
| rs236201595             | 75706286-75706296 | E030042O20Rik | 1655-1645       | -1655-1645      | 5'flanking | CAAACAGAATG del      | I           | CAAACAG AATG |              |     |       |         |         |            |          |       |        |        |      |             |          |         |           |         |   |
| rs211905706             | 75706239          | E030042O20Rik | 1598            | -1598           | 5'flanking | G/T                  | I           | T            | T            | T   | T     | T       | T       | T          | T        | T     | T      | T      | T    | T           | T        | T       | G         | T       |   |
| rs245907677             | 75706152          | E030042O20Rik | 1511            | -1511           | 5'flanking | C/T                  | I           | C            | C            | C   | C     | C       | C       | C          | C        | C     | C      | C      | C    | C           | C        | C       | T         | C       |   |
| rs231965425             | 75706141          | E030042O20Rik | 1500            | -1500           | 5'flanking | A/T                  | I           | A            | A            | A   | A     | A       | A       | A          | A        | A     | A      | A      | A    | A           | A        | A       | T         | A       |   |
| rs216029209             | 75706088          | E030042O20Rik | 1447            | -1447           | 5'flanking | A/G                  | I           | A            | A            | A   | A     | A       | A       | A          | A        | A     | A      | A      | A    | A           | A        | A       | A         | G       | A |
| rs245659186             | 75706056          | E030042O20Rik | 1415            | -1415           | 5'flanking | A/C                  | I           | A            | A            | A   | A     | A       | A       | A          | A        | A     | A      | A      | A    | A           | A        | A       | A         | C       | A |
| rs225603345             | 75706018          | E030042O20Rik | 1377            | -1377           | 5'flanking | G/T                  | I           | G            |              |     |       |         |         |            |          |       |        |        |      |             |          |         |           |         |   |
| rs219655931             | 75705967-75705973 | E030042O20Rik | 1332-1326       | -1332-1326      | 5'flanking | TTTTTTT del          | I           | TTTTTTT      |              |     |       |         |         |            |          |       |        |        |      |             |          |         |           |         |   |
| rd233902846             | 75705966          | E030042O20Rik | 1325            | -1325           | 5'flanking | A/T                  | I           | A            |              |     |       |         |         |            |          |       |        |        |      |             |          |         |           |         |   |
| rs214254775             | 75705965-75708966 | E030042O20Rik | 1324            | -1324           | 5'flanking | TTTTTTTTTTTTTTTT add | I           | AA           |              |     |       |         |         |            |          |       |        |        |      |             |          |         |           |         |   |
| rs235569319             | 75705858          | E030042O20Rik | 1217            | -1217           | 5'flanking | A del                | I           | A            |              |     |       |         |         |            |          |       |        |        |      |             |          |         |           |         |   |
| rs250669934             | 75705818-75705819 | E030042O20Rik | 1177            | -1177           | 5'flanking | A add                | I           | GA           |              |     |       |         |         |            |          |       |        |        |      |             |          |         |           |         |   |
| rs215402334             | 75705761-75705766 | E030042O20Rik | 1120            | -1120           | 5'flanking | GTGGTA del           | I           | GTGGTA       |              |     |       |         |         |            |          |       |        |        |      |             |          |         |           |         |   |
| rs218589635             | 75705741          | E030042O20Rik | 1100            | -1100           | 5'flanking | A/T                  | I           | T            | T            | T   | T     | T       | T       | T          | T        | T     | T      | T      | T    | T           | T        | T       | A         | T       |   |
| rs250243737             | 75705738          | E030042O20Rik | 1097            | -1097           | 5'flanking | A/G                  | I           | A            | A            | A   | A     | A       | A       | A          | A        | A     | A      | A      | A    | A           | A        | A       | A         | G       | A |
| rs228660677             | 75705668          | E030042O20Rik | 1027            | -1027           | 5'flanking | A/G                  | I           | G            | G            | G   | G     | G       | G       | G          | G        | G     | G      | G      | G    | G           | G        | G       | A         | G       |   |
| rs256608517             | 75705565          | E030042O20Rik | 924             | -924            | 5'flanking | A/G                  | I           | G            | G            | G   | G     | G       | G       | G          | G        | G     | G      | G      | G    | G           | G        | A       | A         | G       |   |
| rs47274959              | 75705562          | E030042O20Rik | 921             | -921            | 5'flanking | A/T                  | I           | A            | A            | T   | T     | A       | T       | A          | A        | T     | T      | A      | T    | A           | T        | T       | T         | A       |   |
| rs216940398             | 75705554-75705555 | E030042O20Rik | 913             | -913            | 5'flanking | T add                | I           | CG           |              |     |       |         |         |            |          |       |        |        |      |             |          |         |           |         |   |
| rs239114134             | 75705540          | E030042O20Rik | 899             | -899            | 5'flanking | C/T                  | I           | C            | T            | T   | C     | T       | T       | C          | C        | T     | T      | C      | T    | C           | T        | C       | T         | C       |   |
| rs46461765              | 75705528          | E030042O20Rik | 887             | -887            | 5'flanking | G/T                  | I           | T            | G            | G   | T     | G       | G       | T          | T        | G     | G      | T      | G    | T           | G        | G       | G         | T       |   |
| rs51449853              | 75705525          | E030042O20Rik | 884             | -884            | 5'flanking | A/C                  | I           | C            | A            | A   | C     | A       | A       | C          | C        | A     | A      | C      | A    | C           | A        | C       | C         | C       |   |
| rs249093111             | 75705512          | E030042O20Rik | 871             | -871            | 5'flanking | C/T                  | I           | C            | T            | T   | C     | T       | T       | C          | C        | T     | T      | C      | T    | C           | T        | T       | T         | C       |   |
| rs263745200             | 75705510          | E030042O20Rik | 869             | -869            | 5'flanking | C/G                  | I           | G            | G            | G   | G     | G       | G       | G          | G        | G     | G      | G      | G    | G           | G        | C       | G         | G       |   |
| rs45651867              | 75705498          | E030042O20Rik | 857             | -857            | 5'flanking | G/T                  | I           | T            | G            | G   | T     | G       | G       | T          | T        | G     | G      | T      | G    | T           | G        | G       | G         | T       |   |
| rs219997531             | 75705495          | E030042O20Rik | 854             | -854            | 5'flanking | A/G                  | I           | G            | G            | G   | G     | G       | G       | G          | G        | G     | G      | G      | G    | G           | G        | G       | A         | G       |   |
| rs251918379             | 75705451          | E030042O20Rik | 810             | -810            | 5'flanking | A/T                  | I           | NC           | T            | T   | T     | T       | T       | T          | T        | T     | T      | T      | T    | T           | T        | T       | A         | T       |   |
| rs27978306              | 75705449          | E030042O20Rik | 808             | -808            | 5'flanking | A/T                  | I           | NC           | T            | A   | A     | T       | A       | A          | T        | A     | A      | T      | A    | T           | A        | T       | T         | T       |   |
| rs216087412             | 75705429          | E030042O20Rik | 788             | -788            | 5'flanking | A/C                  | I           | NC           | A            | A   | A     | A       | A       | A          | A        | A     | A      | A      | A    | A           | A        | C       | A         | A       |   |
| rs261229914             | 75705423-75705424 | E030042O20Rik | 783             | -783            | 5'flanking | AG del               | I           | NC           | AG           |     |       |         |         |            |          |       |        |        |      |             |          |         |           |         |   |
| rs27978307              | 75705400          | E030042O20Rik | 759             | -759            | 5'flanking | C/T                  | I           | NC           | C            | C   | C     | C       | C       | C          | C        | C     | C      | C      | C    | C           | C        | C       | C         | C       |   |
| rs243167395             | 75705359          | E030042O20Rik | 718             | -718            | 5'flanking | A/G                  | I           | NC           | G            | G   | G     | G       | G       | G          | G        | G     | G      | G      | G    | G           | G        | G       | A         | G       |   |
| rs27978308              | 75705307          | E030042O20Rik | 666             | -666            | 5'flanking | A/G                  | I           | NC           | G            | G   | G     | G       | G       | G          | G        | G     | G      | G      | G    | G           | G        | G       | A         | G       |   |
| rs254744098             | 75705294          | E030042O20Rik | 653             | -653            | 5'flanking | A/T                  | I           | NC           | A            | A   | A     | A       | A       | A          | A        | A     | A      | A      | A    | A           | A        | A       | T         | A       |   |
| rs228133419             | 75705179          | E030042O20Rik | 538             | -538            | 5'flanking | G/T                  | I           | NC           | G            | G   | G     | G       | G       | G          | G        | G     | G      | G      | G    | G           | G        | G       | T         | G       |   |
| rs214719520             | 75705111          | E030042O20Rik | 470             | -470            | 5'flanking | A/G                  | I           | NC           | G            | G   | G     | G       | G       | G          | G        | G     | G      | G      | G    | G           | G        | G       | A         | G       |   |
| rs244087730             | 75705101          | E030042O20Rik | 460             | -460            | 5'flanking | A/G                  | I           | NC           | G            | G   | G     | G       | G       | G          | G        | G     | G      | G      | G    | G           | G        | G       | A         | G       |   |
| rs227781699             | 75705081          | E030042O20Rik | 440             | -440            | 5'flanking | C/G                  | I           | NC           | C            | C   | C     | C       | C       | C          | C        | C     | C      | C      | C    | C           | C        | C       | C         | C       |   |
| rs257870353             | 75705067          | E030042O20Rik | 426             | -426            | 5'flanking | C/T                  | I           | NC           | C            | C   | C     | C       | C       | C          | C        | C     | C      | C      | C    | C           | C        | C       | T         | C       |   |
| rs244877440             | 75705022          | E030042O20Rik | 381             | -381            | 5'flanking | A/G                  | I           | NC           | A            | A   | A     | A       | A       | A          | A        | A     | A      | A      | A    | A           | A        | A       | A         | A       |   |
| rs234628138             | 75704973          | E030042O20Rik | 332             | -332            | 5'flanking | A/C                  | I           | NC           | A            | A   | A     | A       | A       | A          | A        | A     | A      | A      | A    | A           | A        | A       | C         | A       |   |
| rs247275247             | 75704961          | E030042O20Rik | 320             | -320            | 5'flanking | A/G                  | I           | NC           | G            | G   | G     | G       | G       | G          | G        | G     | G      | G      | G    | G           | A        | G       | G         | G       |   |
| rs247519047             | 75704922          | E030042O20Rik | 280             | -281            | 5'flanking | G del                | I           | NC           | G            |     |       |         |         |            |          |       |        |        |      |             |          |         |           |         |   |
| rs27978309 (rs51915758) | 75704887          | E030042O20Rik | 246             | -246            | 5'flanking | A/G                  | I           | NC           | G            | A   | A     | G       | A       | A          | G        | A     | A      | G      | A    | G           | A        | C       | C         | G       |   |
| rs218139102             | 75704879          | E030042O20Rik | 238             | -238            | 5'flanking | A/C                  | I           | NC           | C            | C   | C     | C       | C       | C          | C        | C     | C      | C      | C    | C           | C        | C       | C         | C       |   |
| rs251990355             | 75704870          | E030042O20Rik | 229             | -229            | 5'flanking | C/T                  | I           | NC           | T            | T   | T     | T       | T       | T          | T        | T     | T      | T      | T    | T           | T        | T       | C         | T       |   |
| rs238746955             | 75704794          | E030042O20Rik | 153             | -153            | 5'flanking | A/G                  | I           | NC           | A            | A   | A     | A       | A       | A          | A        | A     | A      | A      | A    | A           | A        | A       | G         | A       |   |
| rs221664405             | 75704786          | E030042O20Rik | 145             | -145            | 5'flanking | A/G                  | I           | NC           | A            | A   | A     | A       | A       | A          | A        | A     | A      | A      | A    | A           | A        | A       | G         | A       |   |



| D           | Ch2 bp Location   | Gene   | Distance (gene) | Distance (mRNA) | Region  | Alleles (genome) | Consequence | C57BL/6J | 129S1/Svl mJ | A/J | AKR/J | BALB/cJ | C3H/HeJ | C57BL/6N J | CAST/EIJ | CBA/J | DBA/2J | FVB/NJ | LP/J | NOD/ShiL tJ | NZO/HILJ | PWK/PhJ | SPRET/EIJ | WSB/EIJ |   |
|-------------|-------------------|--------|-----------------|-----------------|---------|------------------|-------------|----------|--------------|-----|-------|---------|---------|------------|----------|-------|--------|--------|------|-------------|----------|---------|-----------|---------|---|
| rs260962476 | 75702453-75702449 | Nfe2l2 | 2188-2192       |                 | intron1 | AAAAC del        | I           | AAAAC    |              |     |       |         |         |            |          |       |        |        |      |             |          |         |           |         |   |
| rs227780357 | 75702429          | Nfe2l2 | 2236            |                 | intron1 | G/T              | I           | T        | T            | T   | T     | T       | T       | T          | T        | T     | T      | T      | T    | T           | T        | T       | T         | G       | T |
| rs215718442 | 75702418          | Nfe2l2 | 2223            |                 | intron1 | A/G              | I           | A        | A            | A   | A     | A       | A       | A          | A        | A     | A      | A      | A    | A           | A        | A       | A         | G       | A |
| rs27978323  | 75702365          | Nfe2l2 | 2276            |                 | intron1 | A/G              | I           | A        | A            | A   | A     | A       | A       | A          | A        | A     | A      | A      | A    | A           | A        | A       | A         | G       | A |
| rs233027754 | 75702347          | Nfe2l2 | 2294            |                 | intron1 | A/G              | I           | A        | A            | A   | A     | A       | A       | A          | A        | A     | A      | A      | A    | A           | A        | A       | A         | G       | A |
| rs264824686 | 75702311          | Nfe2l2 | 2330            |                 | intron1 | C/T              | I           | C        | C            | C   | C     | C       | C       | C          | C        | C     | C      | C      | C    | C           | C        | C       | C         | C       | C |
| rs236087283 | 75702243          | Nfe2l2 | 2398            |                 | intron1 | G/T              | I           | G        | G            | G   | G     | G       | G       | G          | G        | G     | G      | G      | G    | G           | G        | G       | G         | T       | G |
| rs226255008 | 75702206          | Nfe2l2 | 2435            |                 | intron1 | A/G              | I           | G        | G            | G   | G     | G       | G       | G          | G        | G     | G      | G      | G    | G           | G        | G       | A         | G       | G |
| rs255552658 | 75702188          | Nfe2l2 | 2453            |                 | intron1 | A/G              | I           | G        | G            | G   | G     | G       | G       | G          | G        | G     | G      | G      | G    | G           | G        | G       | A         | A       | G |
| rs240122691 | 75702088          | Nfe2l2 | 2553            |                 | intron1 | C/T              | I           | C        | C            | C   | C     | C       | C       | C          | C        | C     | C      | C      | C    | C           | C        | C       | C         | T       | C |
| rs224257344 | 75702048          | Nfe2l2 | 2593            |                 | intron1 | A/G              | I           | A        | A            | A   | A     | A       | A       | A          | A        | A     | A      | A      | A    | A           | A        | A       | A         | G       | A |
| rs261199728 | 75702037          | Nfe2l2 | 2604            |                 | intron1 | C/T              | I           | C        | C            | C   | C     | C       | C       | C          | C        | C     | C      | C      | C    | C           | C        | C       | C         | C       | C |
| rs250628545 | 75702004          | Nfe2l2 | 2637            |                 | intron1 | C/T              | I           | C        | C            | C   | C     | C       | C       | C          | C        | C     | C      | C      | C    | C           | C        | C       | C         | C       | C |
| rs222043619 | 75701973          | Nfe2l2 | 2668            |                 | intron1 | C/T              | I           | T        | T            | T   | T     | T       | T       | T          | T        | T     | T      | T      | T    | T           | T        | T       | T         | T       | T |
| rs27978324  | 75701971          | Nfe2l2 | 2670            |                 | intron1 | A/C              | I           | C        | C            | C   | C     | C       | C       | C          | C        | C     | C      | C      | C    | C           | C        | C       | A         | C       | C |
| rs233141858 | 75701918          | Nfe2l2 | 2723            |                 | intron1 | G/T              | I           | T        | T            | T   | T     | T       | T       | T          | T        | T     | T      | T      | T    | T           | T        | T       | T         | G       | T |
| rs214186430 | 75701868          | Nfe2l2 | 2773            |                 | intron1 | C/T              | I           | T        | T            | T   | T     | T       | T       | T          | T        | T     | T      | T      | T    | T           | T        | T       | T         | T       | T |
| rs250976411 | 75701863          | Nfe2l2 | 2778            |                 | intron1 | C/T              | I           | C        | C            | C   | C     | C       | C       | C          | C        | C     | C      | C      | C    | C           | C        | C       | C         | C       | C |
| rs27978325  | 75701848          | Nfe2l2 | 2793            |                 | intron1 | C/T              | I           | C        | C            | C   | C     | C       | C       | C          | C        | C     | C      | C      | C    | C           | C        | C       | C         | C       | C |
| rs27978326  | 75701762          | Nfe2l2 | 2879            |                 | intron1 | A/G              | I           | G        | G            | G   | G     | G       | G       | G          | G        | G     | G      | G      | G    | G           | G        | G       | G         | G       | G |
| rs254720551 | 75701732          | Nfe2l2 | 2909            |                 | intron1 | C/G              | I           | G        | G            | G   | G     | G       | G       | G          | G        | G     | G      | G      | G    | G           | G        | G       | G         | G       | G |
| rs234035577 | 75701686          | Nfe2l2 | 2955            |                 | intron1 | C/T              | I           | T        | T            | T   | T     | T       | T       | T          | T        | T     | T      | T      | T    | T           | T        | T       | T         | C       | T |
| rs212749974 | 75701672          | Nfe2l2 | 2969            |                 | intron1 | C/T              | I           | C        | C            | C   | C     | C       | C       | C          | C        | C     | C      | C      | C    | C           | C        | C       | C         | C       | C |
| rs242203906 | 75701670          | Nfe2l2 | 2971            |                 | intron1 | C/T              | I           | T        | T            | T   | T     | T       | T       | T          | T        | T     | T      | T      | T    | T           | T        | T       | T         | T       | T |
| rs225922718 | 75701662          | Nfe2l2 | 2979            |                 | intron1 | C/T              | I           | T        | T            | T   | T     | T       | T       | T          | T        | T     | T      | T      | T    | T           | T        | T       | T         | T       | T |
| rs255621662 | 75701649          | Nfe2l2 | 2992            |                 | intron1 | C/T              | I           | C        | C            | C   | C     | C       | C       | C          | C        | C     | C      | C      | C    | C           | C        | C       | C         | C       | C |
| rs240187610 | 75701642          | Nfe2l2 | 2999            |                 | intron1 | C/T              | I           | T        | T            | T   | T     | T       | T       | T          | T        | T     | T      | T      | T    | T           | T        | T       | T         | C       | T |
| rs231756366 | 75701617          | Nfe2l2 | 3024            |                 | intron1 | A/G              | I           | G        | G            | G   | G     | G       | G       | G          | G        | G     | G      | G      | G    | G           | G        | G       | A         | G       | G |
| rs266157706 | 75701615          | Nfe2l2 | 3026            |                 | intron1 | G/T              | I           | T        | T            | T   | T     | T       | T       | T          | T        | T     | T      | T      | T    | T           | T        | T       | T         | G       | T |
| rs248000702 | 75701597          | Nfe2l2 | 3044            |                 | intron1 | A/C              | I           | A        | A            | A   | A     | A       | A       | A          | A        | A     | A      | A      | A    | A           | A        | A       | A         | A       | A |
| rs221566222 | 75701586          | Nfe2l2 | 3055            |                 | intron1 | C/T              | I           | T        | T            | T   | T     | T       | T       | T          | T        | T     | T      | T      | T    | T           | T        | T       | T         | T       | T |
| rs256344369 | 75701569          | Nfe2l2 | 3072            |                 | intron1 | A/T              | I           | T        | T            | T   | T     | T       | T       | T          | T        | T     | T      | T      | T    | T           | T        | T       | T         | A       | T |
| rs240013834 | 75701489          | Nfe2l2 | 3152            |                 | intron1 | G/T              | I           | G        | G            | G   | G     | G       | G       | G          | G        | G     | G      | G      | G    | G           | G        | G       | G         | T       | G |
| rs219777858 | 75701390          | Nfe2l2 | 3251            |                 | intron1 | C/T              | I           | C        | C            | C   | C     | C       | C       | C          | C        | C     | C      | C      | C    | C           | C        | C       | C         | C       | C |
| rs251041126 | 75701351          | Nfe2l2 | 3290            |                 | intron1 | A/C              | I           | A        | A            | A   | A     | A       | A       | A          | A        | A     | A      | A      | A    | A           | A        | A       | A         | A       | A |
| rs240689536 | 75701307          | Nfe2l2 | 3334            |                 | intron1 | C/T              | I           | T        | T            | T   | T     | T       | T       | T          | T        | T     | T      | T      | T    | T           | T        | T       | T         | T       | T |
| rs223937661 | 75701219          | Nfe2l2 | 3422            |                 | intron1 | A/C              | I           | C        | C            | C   | C     | C       | C       | C          | C        | C     | C      | C      | C    | C           | C        | C       | C         | C       | A |
| rs264032099 | 75701139          | Nfe2l2 | 3502            |                 | intron1 | C/T              | I           | C        | C            | C   | C     | C       | C       | C          | C        | C     | C      | C      | C    | C           | C        | C       | C         | C       | C |
| rs239115477 | 75701066          | Nfe2l2 | 3575            |                 | intron1 | A/G              | I           | G        | G            | G   | G     | G       | G       | G          | G        | G     | G      | G      | G    | G           | G        | G       | G         | G       | G |
| rs27978327  | 75701047          | Nfe2l2 | 3594            |                 | intron1 | A/C              | I           | A        |              |     |       |         |         |            |          |       |        |        |      |             |          |         |           |         |   |
| rs212880751 | 75701044          | Nfe2l2 | 3597            |                 | intron1 | C/T              | I           | T        | T            | T   | T     | T       | T       | T          | T        | T     | T      | T      | T    | T           | T        | T       | T         | C       | T |
| rs242263241 | 75701043          | Nfe2l2 | 3598            |                 | intron1 | A/T              | I           | A        | A            | A   | A     | A       | A       | A          | A        | A     | A      | A      | A    | A           | A        | A       | A         | A       | A |
| rs232043389 | 75701040          | Nfe2l2 | 3601            |                 | intron1 | G/T              | I           | T        | T            | T   | T     | T       | T       | T          | T        | T     | T      | T      | T    | T           | T        | T       | T         | T       | T |
| rs213520543 | 75701028          | Nfe2l2 | 3613            |                 | intron1 | G/T              | I           | T        | T            | T   | T     | T       | T       | T          | T        | T     | T      | T      | T    | T           | T        | T       | T         | T       | T |
| rs253369439 | 75701024          | Nfe2l2 | 3617            |                 | intron1 | A/G              | I           | G        | G            | G   | G     | G       | G       | G          | G        | G     | G      | G      | G    | G           | G        | G       | G         | A       | G |
| rs232343345 | 75700958          | Nfe2l2 | 3683            |                 | intron1 | A/G              | I           | G        | G            | G   | G     | G       | G       | G          | G        | G     | G      | G      | G    | G           | G        | G       | G         | G       | G |
| rs264485839 | 75700870          | Nfe2l2 | 3771            |                 | intron1 | A/T              | I           | T        | T            | T   | T     | T       | T       | T          | T        | T     | T      | T      | T    | T           | T        | T       | A         | T       | T |
| rs259262655 | 75700850          | Nfe2l2 | 3791            |                 | intron1 | C/T              | I           | T        | T            | T   | T     | T       | T       | T          | T        | T     | T      | T      | T    | T           | T        | T       | T         | T       | T |
| rs228811958 | 75700833          | Nfe2l2 | 3808            |                 | intron1 | A/T              | I           | T        | T            | T   | T     | T       | T       | T          | T        | T     | T      | T      | T    | T           | T        | T       | A         | T       | T |
| rs27978328  | 75700826          | Nfe2l2 | 3815            |                 | intron1 | A/G              | I           | A        | A            | A   | A     | A       | A       | A          | A        | A     | A      | A      | A    | A           | A        | A       | A         | A       | A |
| rs240076902 | 75700803          | Nfe2l2 | 3838            |                 | intron1 | A/G              | I           | G        | G            | G   | G     | G       | G       | G          | G        | G     | G      | G      | G    | G           | G        | G       | G         | A       | G |
| rs238377034 | 75700784          | Nfe2l2 | 3857            |                 | intron1 | T del            | I           | T        |              |     |       |         |         |            |          |       |        |        |      |             |          |         |           |         |   |
| rs219833542 | 75700782          | Nfe2l2 | 3859            |                 | intron1 | C/T              | I           | T        | T            | T   | T     | T       | T       | T          | T        | T     | T      | T      | T    | T           | T        | T       | T         | C       | T |
| rs230390114 | 75700752-75700751 | Nfe2l2 | 3889-3890       |                 | intron1 | AC del           | I           | AC       |              |     |       |         |         |            |          |       |        |        |      |             |          |         |           |         |   |
| rs260185989 | 75700733          | Nfe2l2 | 3908            |                 | intron1 | C/T              | I           | T        | T            | T   | T     | T       | T       | T          | T        | T     | T      | T      | T    | T           | T        | T       | T         | C       | T |
| rs225226082 | 75700715          | Nfe2l2 | 3926            |                 | intron1 | C/T              | I           | T        | T            | T   | T     | T       | T       | T          | C        | T     | T      | T      | T    | T           | T        | T       | T         | T       | T |
| rs27978329  | 75700710          | Nfe2l2 | 3931            |                 | intron1 | C/T              | I           | T        | C            | C   | T     | C       | C       | T          | C        | C     | C      | C      | C    | C           | C        | C       | C         | C       | C |
| rs260685884 | 75700687          | Nfe2l2 | 3954            |                 | intron1 | C/T              | I           | T        | T            | T   | T     | T       | T       | T          | C        | T     | T      | T      | T    | T           | T        | T       | T         | T       | T |
| rs241722789 | 75700666          | Nfe2l2 | 3975            |                 | intron1 | A/G              | I           | A        | A            | A   | A     | A       | A       | A          | A        | A     | A      | A      | A    | A           | A        | A       | A         | A       | A |
| rs27978330  | 75700665          | Nfe2l2 | 3976            |                 | intron1 | A/G              | I           | G        | G            | G   | G     | G       | G       | G          | A        | G     | G      | G      | G    | G           | G        | G       | G         | A       | G |
| rs265063374 | 75700628-75700627 | Nfe2l2 | 4013-4014       |                 | intron1 | C add            | I           | GC       |              |     |       |         |         |            |          |       |        |        |      |             |          |         |           |         |   |
| rs27978331  | 75700602          | Nfe2l2 | 4039            |                 | intron1 | C/T              | I           | T        | C            | C   | T     | C       | C       | T          | C        | C     | C      | T      | C    | C           | C        | C       | C         | C       | C |
| rs232099121 | 75700593          | Nfe2l2 | 4048            |                 | intron1 | A/G              | I           | G        | G            | G   | G     | G       | G       | G          | G        | G     | G      | G      | G    | G           | G        | G       | A         | G       | G |
| rs266085131 | 75700568          | Nfe2l2 |                 |                 |         |                  |             |          |              |     |       |         |         |            |          |       |        |        |      |             |          |         |           |         |   |



| D           | Ch2 bp Location   | Gene   | Distance (gene) | Distance (mRNA) | Region  | Alleles (genome) | Consequence | C57BL/6J | 129S1/Svl mJ | A/J | AKR/J | BALB/cJ | C3H/HeJ | C57BL/6N J | CAST/EIJ | CBA/J | DBA/2J | FVB/NJ | LP/J | NOD/ShiL tJ | NZO/HILtJ | PWK/PhJ | SPRET/EIJ | WSB/EIJ |   |
|-------------|-------------------|--------|-----------------|-----------------|---------|------------------|-------------|----------|--------------|-----|-------|---------|---------|------------|----------|-------|--------|--------|------|-------------|-----------|---------|-----------|---------|---|
| rs27978337  | 75698829          | Nfe2l2 | 5812            |                 | intron1 | A/T              | I           | A        | A            | A   | A     | A       | A       | A          | A        | A     | A      | A      | A    | A           | A         | A       | T         | A       | A |
| rs243339667 | 75698823          | Nfe2l2 | 5818            |                 | intron1 | A/G              | I           | G        | G            | G   | G     | G       | G       | G          | G        | G     | G      | G      | G    | G           | G         | G       | A         | G       | G |
| rs223688217 | 75698767          | Nfe2l2 | 5874            |                 | intron1 | G/T              | I           | T        | T            | T   | T     | T       | T       | T          | T        | T     | T      | T      | T    | T           | T         | T       | G         | G       | T |
| rs217407978 | 75698713          | Nfe2l2 | 5928            |                 | intron1 | A/G              | I           | G        | G            | G   | G     | G       | G       | G          | G        | G     | G      | G      | G    | G           | G         | A       | G         | G       | G |
| rs244349460 | 75698709          | Nfe2l2 | 5932            |                 | intron1 | A/G              | I           | G        | G            | G   | G     | G       | G       | G          | G        | G     | G      | G      | G    | G           | G         | G       | A         | G       | G |
| rs229858119 | 75698699          | Nfe2l2 | 5942            |                 | intron1 | A/T              | I           | T        | T            | T   | T     | T       | T       | T          | A        | T     | T      | T      | T    | T           | T         | T       | A         | A       | A |
| rs263403778 | 75698690          | Nfe2l2 | 5951            |                 | intron1 | A/G              | I           | A        | A            | A   | A     | A       | A       | A          | A        | A     | A      | A      | A    | A           | A         | A       | A         | G       | A |
| rs247837008 | 75698657          | Nfe2l2 | 5984            |                 | intron1 | C/T              | I           | C        | C            | C   | C     | C       | C       | C          | C        | C     | C      | C      | C    | C           | C         | C       | T         | C       | C |
| rs226681843 | 75698621          | Nfe2l2 | 6020            |                 | intron1 | A/G              | I           | G        | G            | G   | G     | G       | G       | G          | G        | G     | G      | G      | G    | G           | G         | A       | A         | A       | G |
| rs265907281 | 75698613          | Nfe2l2 | 6028            |                 | intron1 | A/G              | I           | A        | A            | A   | A     | A       | A       | A          | A        | A     | A      | A      | A    | A           | A         | A       | A         | G       | A |
| rs237956040 | 75698515          | Nfe2l2 | 6126            |                 | intron1 | C/T              | I           | T        | T            | T   | T     | T       | T       | T          | C        | T     | T      | T      | T    | T           | T         | T       | T         | C       | C |
| rs218020200 | 75698509          | Nfe2l2 | 6132            |                 | intron1 | C/T              | I           | T        | T            | T   | T     | T       | T       | T          | C        | T     | T      | T      | T    | T           | T         | T       | T         | C       | C |
| rs252256218 | 75698438          | Nfe2l2 | 6203            |                 | intron1 | A/G              | I           | G        | G            | G   | G     | G       | G       | G          | A        | G     | G      | G      | G    | G           | G         | G       | A         | A       | A |
| rs216531668 | 75698418-75698417 | Nfe2l2 | 6223-6224       |                 | intron1 | TT del           | I           | TT       |              |     |       |         |         |            |          |       |        |        |      |             |           |         |           |         |   |
| rs231963433 | 75698416          | Nfe2l2 | 6225            |                 | intron1 | G/T              | I           | G        |              |     |       |         |         |            |          |       |        |        |      |             |           |         |           |         |   |
| rs258160886 | 75698347-75698346 | Nfe2l2 | 6294-6295       |                 | intron1 | A add            | I           | CA       |              |     |       |         |         |            |          |       |        |        |      |             |           |         |           |         |   |
| rs29541228  | 75698333          | Nfe2l2 | 6308            |                 | intron1 | C/G              | I           | G        | C            | C   | G     | C       | C       | G          | C        | C     | C      | G      | C    | C           | C         | C       | C         | C       | C |
| rs241106629 | 75698328-75698327 | Nfe2l2 | 6313-6314       |                 | intron1 | CA del           | I           | CA       |              |     |       |         |         |            |          |       |        |        |      |             |           |         |           |         |   |
| rs258719975 | 75698284          | Nfe2l2 | 6357            |                 | intron1 | A/G              | I           | A        | A            | A   | A     | A       | A       | A          | A        | A     | A      | A      | A    | A           | A         | A       | A         | G       | A |
| rs243093852 | 75698258          | Nfe2l2 | 6383            |                 | intron1 | A/C              | I           | C        | C            | C   | C     | C       | C       | C          | C        | C     | C      | C      | C    | C           | C         | C       | C         | C       | A |
| rs248986100 | 75698230          | Nfe2l2 | 6411            |                 | intron1 | A del            | I           | A        |              |     |       |         |         |            |          |       |        |        |      |             |           |         |           |         |   |
| rs218604721 | 75698202          | Nfe2l2 | 6439            |                 | intron1 | A/G              | I           | A        | A            | A   | A     | A       | A       | A          | A        | A     | A      | A      | A    | A           | A         | A       | A         | G       | A |
| rs261249066 | 75698183-75698182 | Nfe2l2 | 6458-6459       |                 | intron1 | AA del           | I           | AA       |              |     |       |         |         |            |          |       |        |        |      |             |           |         |           |         |   |
| rs243395291 | 75698143          | Nfe2l2 | 6498            |                 | intron1 | A/G              | I           | A        | A            | A   | A     | A       | A       | A          | A        | A     | A      | A      | A    | A           | A         | A       | A         | G       | A |
| rs27978338  | 75698114          | Nfe2l2 | 6527            |                 | intron1 | A/G              | I           | A        | A            | A   | A     | A       | A       | A          | G        | A     | A      | A      | A    | A           | A         | A       | A         | G       | G |
| rs3688913   | 75698104          | Nfe2l2 | 6537            |                 | intron1 | C/T              | I           | C        | T            | T   | C     | T       | T       | C          | C        | T     | T      | C      | T    | C           | T         | C       | C         | C       | C |
| rs27978339  | 75698102          | Nfe2l2 | 6539            |                 | intron1 | A/C              | I           | C        | C            | C   | C     | C       | C       | C          | C        | C     | C      | C      | C    | C           | C         | C       | A         | C       | C |
| rs27978340  | 75698098          | Nfe2l2 | 6543            |                 | intron1 | A/G              | I           | G        | G            | G   | G     | G       | G       | G          | A        | G     | G      | G      | G    | G           | G         | G       | G         | G       | A |
| rs252454188 | 75698095-75698094 | Nfe2l2 | 6546-6547       |                 | intron1 | CA add           | I           | TT       |              |     |       |         |         |            |          |       |        |        |      |             |           |         |           |         |   |
| rs249947002 | 75698047          | Nfe2l2 | 6594            |                 | intron1 | A del            | I           | A        |              |     |       |         |         |            |          |       |        |        |      |             |           |         |           |         |   |
| rs265643467 | 75698032          | Nfe2l2 | 6609            |                 | intron1 | A/T              | I           | A        | A            | A   | A     | A       | A       | A          | T        | A     | A      | A      | A    | A           | A         | A       | A         | A       | T |
| rs251968117 | 75698027          | Nfe2l2 | 6614            |                 | intron1 | A/C              | I           | C        | C            | C   | C     | C       | C       | C          | A        | C     | C      | C      | C    | C           | C         | C       | C         | C       | A |
| rs260277664 | 75698013-75698011 | Nfe2l2 | 6628-6629       |                 | intron1 | AAC del          | I           | AAC      |              |     |       |         |         |            |          |       |        |        |      |             |           |         |           |         |   |
| rs234553734 | 75697966          | Nfe2l2 | 6675            |                 | intron1 | A/G              | I           | A        | A            | A   | A     | A       | A       | A          | G        | A     | A      | A      | A    | A           | A         | A       | A         | A       | A |
| rs246174753 | 75697962          | Nfe2l2 | 6679            |                 | intron1 | T del            | I           | T        |              |     |       |         |         |            |          |       |        |        |      |             |           |         |           |         |   |
| rs260634152 | 75697897          | Nfe2l2 | 6744            |                 | intron1 | C/T              | I           | C        | C            | C   | C     | C       | C       | C          | T        | C     | C      | C      | C    | C           | C         | C       | C         | T       | T |
| rs25124205  | 75697862          | Nfe2l2 | 6779            |                 | intron1 | G del            | I           | G        |              |     |       |         |         |            |          |       |        |        |      |             |           |         |           |         |   |
| rs27978341  | 75697860          | Nfe2l2 | 6781            |                 | intron1 | A/C              | I           | A        |              |     |       |         |         |            |          |       |        |        |      |             |           |         |           |         |   |
| rs238021329 | 75697829          | Nfe2l2 | 6812            |                 | intron1 | A/G              | I           | G        | G            | G   | G     | G       | G       | G          | G        | G     | G      | G      | G    | G           | G         | G       | A         | G       | G |
| rs27978342  | 75697669          | Nfe2l2 | 6972            |                 | intron1 | A/G              | I           | A        |              |     |       |         |         |            |          |       |        |        |      |             |           |         |           |         |   |
| rs233458866 | 75697665-75697664 | Nfe2l2 | 6976-6977       |                 | intron1 | AG del           | I           | AG       |              |     |       |         |         |            |          |       |        |        |      |             |           |         |           |         |   |
| rs218084461 | 75697642          | Nfe2l2 | 6999            |                 | intron1 | A/T              | I           | T        | T            | T   | T     | T       | T       | T          | T        | T     | T      | T      | T    | T           | T         | T       | A         | T       | T |
| rs258213605 | 75697583          | Nfe2l2 | 7058            |                 | intron1 | C/T              | I           | T        | T            | T   | T     | T       | T       | T          | T        | T     | T      | T      | T    | T           | T         | T       | T         | C       | T |
| rs215071073 | 75697457-75697456 | Nfe2l2 | 7184-7185       |                 | intron1 | GAG add          | I           | TG       |              |     |       |         |         |            |          |       |        |        |      |             |           |         |           |         |   |
| rs27978343  | 75697438          | Nfe2l2 | 7203            |                 | intron1 | A/G              | I           | A        | A            | A   | A     | A       | A       | A          | G        | A     | A      | A      | A    | A           | A         | A       | A         | G       | G |
| rs225151570 | 75697385          | Nfe2l2 | 7256            |                 | intron1 | C/T              | I           | T        | T            | T   | T     | T       | T       | T          | T        | T     | T      | T      | T    | T           | T         | T       | T         | C       | T |
| rs262978641 | 75697369          | Nfe2l2 | 7272            |                 | intron1 | C/T              | I           | C        | C            | C   | C     | C       | C       | C          | C        | C     | C      | C      | C    | C           | C         | C       | C         | C       | C |
| rs240411269 | 75697362          | Nfe2l2 | 7279            |                 | intron1 | A/T              | I           | A        | A            | A   | A     | A       | A       | A          | A        | A     | A      | A      | A    | A           | A         | A       | A         | T       | A |
| rs259918473 | 75697257-75697256 | Nfe2l2 | 7384-7385       |                 | intron1 | A add            | I           | TA       |              |     |       |         |         |            |          |       |        |        |      |             |           |         |           |         |   |
| rs226248995 | 75697228          | Nfe2l2 | 7413            |                 | intron1 | A/G              | I           | G        | G            | G   | G     | G       | G       | G          | G        | G     | G      | G      | G    | G           | G         | G       | A         | G       | G |
| rs249316494 | 75697174          | Nfe2l2 | 7467            |                 | intron1 | C/T              | I           | C        | C            | C   | C     | C       | C       | C          | C        | C     | C      | C      | C    | C           | C         | C       | C         | T       | C |
| rs230331568 | 75697172          | Nfe2l2 | 7469            |                 | intron1 | C/T              | I           | C        | C            | C   | C     | C       | C       | C          | C        | C     | C      | C      | C    | C           | C         | C       | C         | T       | C |
| rs214723803 | 75697160          | Nfe2l2 | 7481            |                 | intron1 | C/T              | I           | C        | C            | C   | C     | C       | C       | C          | C        | C     | C      | C      | C    | C           | C         | C       | C         | T       | C |
| rs244090892 | 75697117          | Nfe2l2 | 7524            |                 | intron1 | C/T              | I           | T        | T            | T   | T     | T       | T       | T          | T        | T     | T      | T      | T    | T           | T         | T       | T         | T       | T |
| rs241381264 | 75697051          | Nfe2l2 | 7590            |                 | intron1 | A/T              | I           | T        | T            | T   | T     | T       | T       | T          | T        | T     | T      | T      | T    | T           | T         | T       | A         | T       | T |
| rs216431792 | 75697026          | Nfe2l2 | 7615            |                 | intron1 | A/G              | I           | G        | G            | G   | G     | G       | G       | G          | G        | G     | G      | G      | G    | G           | G         | G       | A         | A       | G |
| rs248783695 | 75697010-75697009 | Nfe2l2 | 7631-7632       |                 | intron1 | T add            | I           | CT       |              |     |       |         |         |            |          |       |        |        |      |             |           |         |           |         |   |
| rs241975610 | 75696989          | Nfe2l2 | 7652            |                 | intron1 | A/G              | I           | G        | G            | G   | G     | G       | G       | G          | A        | G     | G      | G      | G    | G           | A         | G       | A         | A       | A |
| rs27978344  | 75696875          | Nfe2l2 | 7766            |                 | intron1 | C/T              | I           | T        | T            | T   | T     | T       | T       | T          | T        | T     | T      | T      | T    | T           | T         | T       | T         | C       | C |
| rs216376541 | 75696847          | Nfe2l2 | 7794            |                 | intron1 | A/G              | I           | G        | G            | G   | G     | G       | G       | G          | G        | G     | G      | G      | G    | G           | G         | G       | A         | G       | G |















| D           | Ch2 bp Location   | Gene   | Distance (gene) | Distance (mRNA) | Region  | Alleles (genome)   | Consequence | C57BL/6J        | 129S1/Svlmj | A/J | AKR/J | BALB/cJ | C3H/HeJ | C57BL/6Nj | CAST/EiJ | CBA/J | DBA/2J | FVB/NJ | LP/J | NOD/ShiLj | NZO/HILJ | PWK/PhJ | SPRET/EiJ | WSB/EiJ |
|-------------|-------------------|--------|-----------------|-----------------|---------|--------------------|-------------|-----------------|-------------|-----|-------|---------|---------|-----------|----------|-------|--------|--------|------|-----------|----------|---------|-----------|---------|
| rs247845240 | 75682419-75682418 | Nfe2l2 | 22222-22223     |                 | intron1 | TA del             | I           | TA              |             |     |       |         |         |           |          |       |        |        |      |           |          |         |           |         |
| rs263152656 | 75682405-75682403 | Nfe2l2 | 22236-22238     |                 | intron1 | TTT del            | I           | TTT             |             |     |       |         |         |           |          |       |        |        |      |           |          |         |           |         |
| rs249354677 | 75682403-75682402 | Nfe2l2 | 22238-22239     |                 | intron1 | TTTTT add          | I           | CT              |             |     |       |         |         |           |          |       |        |        |      |           |          |         |           |         |
| rs229062009 | 75682384-75682383 | Nfe2l2 | 22257-22258     |                 | intron1 | C add              | I           | TC              |             |     |       |         |         |           |          |       |        |        |      |           |          |         |           |         |
| rs259536965 | 75682374          | Nfe2l2 | 22267           |                 | intron1 | A/G                | I           | G               | G           | G   | G     | G       | G       | G         | G        | G     | G      | G      | G    | G         | G        | G       | G         | A       |
| rs232802991 | 75682354          | Nfe2l2 | 22287           |                 | intron1 | A/G                | I           | A               | A           | A   | A     | A       | A       | A         | A        | A     | A      | A      | A    | A         | A        | A       | A         | G       |
| rs254858925 | 75682337-75682336 | Nfe2l2 | 22304-22305     |                 | intron1 | T add              | I           | AT              |             |     |       |         |         |           |          |       |        |        |      |           |          |         |           |         |
| rs32935671  | 75682302          | Nfe2l2 | 22339           |                 | intron1 | A/C                | I           | C               | A           | A   | C     | A       | A       | C         | C        | A     | A      | C      | A    | C         | A        | C       | C         | C       |
| rs264637599 | 75682282          | Nfe2l2 | 22359           |                 | intron1 | C/T                | I           | C               | C           | C   | C     | C       | C       | C         | C        | C     | C      | C      | C    | C         | C        | C       | T         | C       |
| rs219603117 | 75682234-75682233 | Nfe2l2 | 22407-22408     |                 | intron1 | T add              | I           | AT              |             |     |       |         |         |           |          |       |        |        |      |           |          |         |           |         |
| rs32858611  | 75682191          | Nfe2l2 | 22450           |                 | intron1 | A/G                | I           | A               | G           | G   | A     | G       | G       | A         | G        | G     | G      | A      | G    | G         | G        | G       | G         | G       |
| rs221938247 | 75682093          | Nfe2l2 | 22548           |                 | intron1 | A/G                | I           | A               | A           | A   | A     | A       | A       | A         | A        | A     | A      | A      | A    | A         | A        | A       | A         | G       |
| rs219190709 | 75681989-75681988 | Nfe2l2 | 22652-22653     |                 | intron1 | TTTA add           | I           | TA              |             |     |       |         |         |           |          |       |        |        |      |           |          |         |           |         |
| rs231775532 | 75681977-75681976 | Nfe2l2 | 22664-22665     |                 | intron1 | TTTTTTT add        | I           | CT              |             |     |       |         |         |           |          |       |        |        |      |           |          |         |           |         |
| rs253805492 | 75681925          | Nfe2l2 | 22716           |                 | intron1 | A/G                | I           | A               | A           | A   | A     | A       | A       | A         | A        | A     | A      | A      | A    | A         | A        | A       | A         | G       |
| rs234151932 | 75681904          | Nfe2l2 | 22737           |                 | intron1 | C/T                | I           | C               | C           | C   | C     | C       | C       | C         | C        | C     | C      | C      | C    | C         | C        | C       | T         | C       |
| rs27978421  | 75681886          | Nfe2l2 | 22755           |                 | intron1 | A/T                | I           | T               | T           | T   | T     | T       | T       | T         | T        | T     | T      | T      | T    | T         | T        | T       | T         | A       |
| rs27978422  | 75681849          | Nfe2l2 | 22792           |                 | intron1 | C/T                | I           | T               | T           | T   | T     | T       | T       | T         | C        | T     | T      | T      | T    | T         | T        | T       | C         | T       |
| rs218555017 | 75681814-75681812 | Nfe2l2 | 22827-22829     |                 | intron1 | TAG del            | I           | TAG             |             |     |       |         |         |           |          |       |        |        |      |           |          |         |           |         |
| rs237320475 | 75681786          | Nfe2l2 | 22855           |                 | intron1 | C/T                | I           | C               | C           | C   | C     | C       | C       | C         | C        | C     | C      | C      | C    | C         | C        | C       | T         | C       |
| rs212421595 | 75681785          | Nfe2l2 | 22856           |                 | intron1 | C/T                | I           | C               | C           | C   | C     | C       | C       | C         | C        | C     | C      | C      | C    | C         | C        | C       | T         | C       |
| rs262651526 | 75681771          | Nfe2l2 | 22870           |                 | intron1 | A/C/T              | I           | T               | T           | T   | T     | T       | T       | T         | C        | T     | T      | T      | T    | T         | T        | T       | A         | T       |
| rs253619508 | 75681713-75681703 | Nfe2l2 | 22928-22938     |                 | intron1 | AAAAAAGTAAAA del   | I           | AAAAAGT<br>AAAA |             |     |       |         |         |           |          |       |        |        |      |           |          |         |           |         |
| rs243753654 | 75681635-75681620 | Nfe2l2 | 23006-23021     |                 | intron1 | ACACACACACACAC del | I           | ACACACACACACAC  |             |     |       |         |         |           |          |       |        |        |      |           |          |         |           |         |
| rs52263804  | 75681580          | Nfe2l2 | 23061           |                 | intron1 | C/T                | I           | T               | C           | C   | T     | C       | C       | T         | T        | C     | C      | T      | C    | T         | C        | T       | T         | T       |
| rs216180461 | 75681542          | Nfe2l2 | 23099           |                 | intron1 | A/G                | I           | G               | G           | G   | G     | G       | G       | G         | G        | G     | G      | G      | G    | G         | G        | G       | A         | G       |
| rs245473635 | 75681540          | Nfe2l2 | 23101           |                 | intron1 | C/T                | I           | C               | C           | C   | C     | C       | C       | C         | C        | C     | C      | C      | C    | C         | C        | C       | T         | C       |
| rs27978423  | 75681459          | Nfe2l2 | 23182           |                 | intron1 | A/G/T              | I           | A               | A           | A   | A     | A       | A       | A         | G        | A     | A      | A      | A    | A         | A        | A       | A         | A       |
| rs27978424  | 75681420          | Nfe2l2 | 23221           |                 | intron1 | C/T                | I           | T               | T           | T   | T     | T       | T       | T         | C        | T     | T      | T      | T    | T         | T        | T       | T         | T       |
| rs253643368 | 75681402          | Nfe2l2 | 23239           |                 | intron1 | A/G                | I           | G               | G           | G   | G     | G       | G       | G         | G        | G     | G      | G      | G    | G         | G        | G       | A         | G       |
| rs27978425  | 75681399          | Nfe2l2 | 23242           |                 | intron1 | C/T                | I           | C               | C           | C   | C     | C       | C       | C         | C        | C     | C      | C      | C    | C         | C        | C       | C         | T       |
| rs254672551 | 75681365-75681364 | Nfe2l2 | 23276-23277     |                 | intron1 | C add              | I           | TC              |             |     |       |         |         |           |          |       |        |        |      |           |          |         |           |         |
| rs33117644  | 75681306          | Nfe2l2 | 23335           |                 | intron1 | C/T                | I           | C               | T           | T   | C     | T       | T       | C         | C        | T     | T      | C      | T    | T         | T        | C       | C         | C       |
| rs243356759 | 75681242-75681238 | Nfe2l2 | 23399-23403     |                 | intron1 | TGGGT del          | I           | TGGGT           |             |     |       |         |         |           |          |       |        |        |      |           |          |         |           |         |
| rs246830545 | 75681170          | Nfe2l2 | 23471           |                 | intron1 | A/G                | I           | G               | G           | G   | G     | G       | G       | G         | G        | G     | G      | G      | G    | G         | G        | G       | A         | G       |
| rs225685586 | 75681123          | Nfe2l2 | 23518           |                 | intron1 | A/G                | I           | G               | G           | G   | G     | G       | G       | G         | G        | G     | G      | G      | G    | G         | G        | G       | A         | G       |
| rs259796141 | 75681073          | Nfe2l2 | 23568           |                 | intron1 | A/G                | I           | G               | G           | G   | G     | G       | G       | G         | G        | G     | G      | G      | G    | G         | G        | G       | A         | G       |
| rs240359404 | 75681058          | Nfe2l2 | 23583           |                 | intron1 | A/C                | I           | C               | C           | C   | C     | C       | C       | C         | C        | C     | C      | C      | C    | C         | C        | C       | A         | C       |
| rs224404301 | 75681025-75681026 | Nfe2l2 | 23616-23617     |                 | intron1 | TT del             | I           | TT              |             |     |       |         |         |           |          |       |        |        |      |           |          |         |           |         |
| rs223639296 | 75680973          | Nfe2l2 | 23668           |                 | intron1 | A/G                | I           | G               | G           | G   | G     | G       | G       | G         | G        | G     | G      | G      | G    | G         | G        | G       | A         | G       |
| rs27978426  | 75680965          | Nfe2l2 | 23676           |                 | intron1 | C/T                | I           | C               | C           | C   | C     | C       | C       | C         | C        | C     | C      | C      | C    | C         | C        | T       | C         | C       |
| rs27978427  | 75680962          | Nfe2l2 | 23679           |                 | intron1 | C/T                | I           | C               | C           | C   | C     | C       | C       | C         | C        | C     | C      | C      | C    | C         | C        | C       | T         | C       |
| rs220186933 | 75680959          | Nfe2l2 | 23682           |                 | intron1 | A/G                | I           | G               | G           | G   | G     | G       | G       | G         | G        | G     | G      | G      | G    | G         | G        | G       | A         | G       |
| rs258265207 | 75680955          | Nfe2l2 | 23686           |                 | intron1 | C/T                | I           | C               | C           | C   | C     | C       | C       | C         | C        | C     | C      | C      | C    | C         | C        | C       | T         | C       |
| rs27978428  | 75680920          | Nfe2l2 | 23721           |                 | intron1 | A/G                | I           | G               | G           | G   | G     | G       | G       | G         | G        | G     | G      | G      | G    | G         | G        | G       | A         | G       |
| rs216239109 | 75680838          | Nfe2l2 | 23803           |                 | intron1 | A/G                | I           | A               | A           | A   | A     | A       | A       | A         | G        | A     | A      | A      | A    | A         | A        | A       | A         | A       |
| rs251491229 | 75680806          | Nfe2l2 | 23835           |                 | intron1 | C/T                | I           | T               | T           | T   | T     | T       | T       | T         | T        | T     | T      | T      | T    | T         | T        | T       | C         | T       |
| rs235405984 | 75680790          | Nfe2l2 | 23851           |                 | intron1 | C/T                | I           | C               | C           | C   | C     | C       | C       | C         | C        | C     | C      | C      | C    | C         | C        | C       | T         | C       |
| rs217182304 | 75680786          | Nfe2l2 | 23855           |                 | intron1 | C/T                | I           | T               | T           | T   | T     | T       | T       | T         | T        | T     | T      | T      | T    | T         | T        | T       | C         | T       |
| rs258936346 | 75680771          | Nfe2l2 | 23870           |                 | intron1 | A/T                | I           | T               | T           | T   | T     | T       | T       | T         | T        | T     | T      | T      | T    | T         | T        | T       | A         | T       |
| rs27978429  | 75680657          | Nfe2l2 | 23984           |                 | intron1 | C/T                | I           | T               | T           | T   | T     | T       | T       | T         | T        | T     | T      | T      | T    | T         | T        | T       | T         | T       |
| rs211759178 | 75680648          | Nfe2l2 | 23993           |                 | intron1 | A/G                | I           | A               | A           | A   | A     | A       | A       | A         | A        | A     | A      | A      | A    | A         | A        | A       | A         | G       |
| rs251129306 | 75680535          | Nfe2l2 | 24106           |                 | intron1 | A/C                | I           | C               | A           | A   | A     | A       | A       | A         | A        | A     | A      | A      | A    | A         | A        | A       | A         | A       |
| rs27978430  | 75680531          | Nfe2l2 | 24110           |                 | intron1 | C/T                | I           | C               | T           | T   | C     | T       | T       | C         | C        | T     | T      | C      | T    | T         | T        | T       | C         | C       |
| rs27978431  | 75680379          | Nfe2l2 | 24262           |                 | intron1 | A/T                | I           | A               | T           | T   | A     | T       | T       | A         | T        | T     | T      | A      | T    | A         | T        | T       | T         | T       |
| rs27978432  | 75680340          | Nfe2l2 | 24301           |                 | intron1 | A/C                | I           | A               | A           | A   | A     | A       | A       | A         | A        | A     | A      | A      | A    | A         | A        | C       | A         | A       |







| D           | Ch2 bp Location | Gene | Distance (gene) | Distance (mRNA) | Region     | Alleles (genome) | Consequence | C57BL/6J | 129S1/Svl mJ | A/J | AKR/J | BALB/cJ | C3H/HeJ | C57BL/6N J | CAST/EIJ | CBA/J | DBA/2J | FVB/NJ | LP/J | NOD/ShiL tJ | NZO/HILJ | PWK/PhJ | SPRET/EIJ | WSB/EIJ |
|-------------|-----------------|------|-----------------|-----------------|------------|------------------|-------------|----------|--------------|-----|-------|---------|---------|------------|----------|-------|--------|--------|------|-------------|----------|---------|-----------|---------|
| rs239674834 | 75675342        |      | 177             |                 | 3'flanking | C/T              |             | C        | C            | C   | C     | C       | C       | C          | C        | C     | C      | C      | C    | C           | C        | C       | T         | C       |
| rs213419141 | 75675334        |      | 185             |                 | 3'flanking | C/T              |             | C        | C            | C   | C     | C       | C       | C          | C        | C     | C      | C      | C    | C           | C        | C       | T         | C       |
| rs249190426 | 75675331        |      | 188             |                 | 3'flanking | A/G              |             | A        | A            | A   | A     | A       | A       | A          | A        | A     | A      | A      | A    | A           | A        | A       | G         | A       |
| rs232907814 | 75675324        |      | 195             |                 | 3'flanking | G/T              |             | G        | G            | G   | G     | G       | G       | G          | G        | G     | G      | G      | G    | T           | G        | G       | G         | G       |
| rs214021885 | 75675323        |      | 196             |                 | 3'flanking | C/T              |             | C        | C            | C   | C     | C       | C       | C          | C        | C     | C      | C      | C    | C           | C        | C       | T         | C       |
| rs48178164  | 75675303        |      | 216             |                 | 3'flanking | A/G              |             | A        | G            | G   | A     | G       | G       | A          | G        | G     | G      | A      | G    | G           | G        | G       | G         | G       |
| rs227681967 | 75675294        |      | 225             |                 | 3'flanking | C/T              |             | C        | C            | C   | C     | C       | C       | C          | C        | C     | C      | C      | C    | C           | C        | C       | T         | C       |
| rs261486797 | 75675285        |      | 234             |                 | 3'flanking | G/T              |             | T        | T            | T   | T     | T       | T       | T          | T        | T     | T      | T      | T    | T           | T        | T       | G         | T       |
| rs259443848 | 75675278        |      | 241             |                 | 3'flanking | A/G              |             | G        | G            | G   | G     | G       | G       | G          | G        | G     | G      | G      | G    | G           | G        | G       | A         | G       |
| rs232922866 | 75675264        |      | 255             |                 | 3'flanking | C/T              |             | T        | T            | T   | T     | T       | T       | T          | T        | T     | T      | T      | T    | T           | T        | T       | C         | T       |
| rs264795377 | 75675263        |      | 256             |                 | 3'flanking | C/T              |             | C        | C            | C   | C     | C       | C       | C          | C        | C     | C      | C      | C    | C           | C        | C       | T         | C       |
| rs240835090 | 75675187        |      | 332             |                 | 3'flanking | A/G              |             | G        | G            | G   | G     | G       | G       | G          | G        | G     | G      | G      | G    | G           | G        | G       | A         | G       |
| rs219770048 | 75675183        |      | 336             |                 | 3'flanking | A/G              |             | A        | A            | A   | A     | A       | A       | A          | A        | A     | A      | A      | A    | A           | A        | A       | A         | A       |
| rs265363464 | 75675114        |      | 405             |                 | 3'flanking | C del            |             | C        |              |     |       |         |         |            |          |       |        |        |      |             |          |         |           |         |
| rs255005507 | 75675103        |      | 416             |                 | 3'flanking | G/T              |             | G        |              |     |       |         |         |            |          |       |        |        |      |             |          |         |           |         |
| rs33428762  | 75675093        |      | 426             |                 | 3'flanking | A/T              |             | T        | A            | A   | T     | A       | A       | T          | T        | A     | A      | T      | A    | A           | A        | T       | T         | A       |
| rs239999563 | 75674955        |      | 564             |                 | 3'flanking | C/T              |             | C        | C            | C   | C     | C       | C       | C          | C        | C     | C      | C      | C    | C           | C        | C       | T         | C       |
| rs220693620 | 75674944        |      | 575             |                 | 3'flanking | C/T              |             | T        | T            | T   | T     | T       | T       | T          | T        | T     | T      | T      | T    | T           | T        | C       | T         | T       |
| rs260798971 | 75674892        |      | 627             |                 | 3'flanking | A/C              |             | C        | C            | C   | C     | C       | C       | C          | C        | C     | C      | C      | C    | C           | C        | C       | A         | C       |
| rs241893311 | 75674886        |      | 633             |                 | 3'flanking | C/T              |             | C        | C            | C   | C     | C       | C       | C          | C        | C     | C      | C      | C    | C           | C        | C       | T         | C       |
| rs27978455  | 75674852        |      | 667             |                 | 3'flanking | A/G              |             | G        | G            | G   | G     | G       | G       | G          | G        | G     | G      | G      | G    | G           | G        | A       | G         | G       |
| rs261018791 | 75674803        |      | 716             |                 | 3'flanking | C/T              |             | C        | C            | C   | C     | C       | C       | C          | C        | C     | C      | C      | C    | C           | C        | C       | T         | C       |
| rs27978456  | 75674741        |      | 778             |                 | 3'flanking | C/T              |             | C        | C            | C   | C     | C       | C       | C          | C        | C     | C      | C      | C    | C           | C        | C       | T         | C       |
| rs213718140 | 75674715        |      | 804             |                 | 3'flanking | A/C              |             | A        | A            | A   | A     | A       | A       | A          | A        | A     | A      | A      | A    | A           | A        | A       | A         | A       |
| rs247267701 | 75674707        |      | 812             |                 | 3'flanking | A/G              |             | A        | A            | A   | A     | A       | A       | A          | G        | A     | A      | A      | A    | A           | A        | A       | A         | A       |
| rs32940094  | 75674558        |      | 961             |                 | 3'flanking | A/G              |             | G        | A            | A   | G     | A       | A       | G          | G        | A     | A      | G      | A    | A           | A        | G       | G         | A       |
| rs229553908 | 75674504        |      | 1015            |                 | 3'flanking | A/G              |             | G        | G            | G   | G     | G       | G       | G          | G        | G     | G      | G      | G    | G           | G        | A       | G         | G       |
| rs261847312 | 75674488        |      | 1031            |                 | 3'flanking | A/G              |             | A        | A            | A   | A     | A       | A       | A          | G        | A     | A      | A      | A    | A           | A        | A       | A         | A       |
| rs27978457  | 75674452        |      | 1067            |                 | 3'flanking | A/T              |             | A        | A            | A   | A     | A       | A       | A          | T        | A     | A      | A      | A    | A           | A        | A       | T         | A       |
| rs255074765 | 75674352        |      | 1167            |                 | 3'flanking | A/C              |             | A        | A            | A   | A     | A       | A       | A          | A        | A     | A      | A      | A    | A           | A        | A       | A         | A       |
| rs226837531 | 75674343        |      | 1176            |                 | 3'flanking | C/T              |             | C        | C            | C   | C     | C       | C       | C          | T        | C     | C      | C      | C    | C           | C        | C       | C         | C       |
| rs266125361 | 75674318        |      | 1201            |                 | 3'flanking | A/G              |             | A        | A            | A   | A     | A       | A       | A          | A        | A     | A      | A      | A    | A           | A        | A       | G         | A       |
| rs247345565 | 75674238        |      | 1281            |                 | 3'flanking | C/T              |             | C        | C            | C   | C     | C       | C       | C          | C        | C     | C      | C      | C    | C           | C        | C       | T         | C       |
| rs220900392 | 75674222        |      | 1297            |                 | 3'flanking | C/T              |             | C        | C            | C   | C     | C       | C       | C          | T        | C     | C      | C      | C    | C           | C        | C       | C         | C       |
| rs255704871 | 75674195        |      | 1324            |                 | 3'flanking | A/G              |             | A        | A            | A   | A     | A       | A       | A          | A        | A     | A      | A      | A    | A           | A        | A       | A         | A       |
| rs27978458  | 75674158        |      | 1361            |                 | 3'flanking | C/T              |             | C        | T            | T   | C     | T       | T       | C          | C        | T     | T      | C      | T    | T           | T        | T       | C         | T       |
| rs27978459  | 75674098        |      | 1421            |                 | 3'flanking | C/T              |             | T        | C            | C   | T     | C       | C       | T          | C        | C     | C      | T      | C    | C           | C        | C       | C         | C       |
| rs29717614  | 75674091        |      | 1428            |                 | 3'flanking | C/T              |             | C        | T            | T   | C     | T       | T       | C          | T        | T     | T      | C      | T    | T           | T        | T       | T         | T       |
| rs233974698 | 75674088        |      | 1431            |                 | 3'flanking | C/T              |             | T        | T            | T   | T     | T       | T       | T          | T        | T     | T      | T      | T    | T           | T        | T       | C         | T       |
| rs219797696 | 75674026        |      | 1493            |                 | 3'flanking | C/T              |             | T        | T            | T   | T     | T       | T       | T          | C        | T     | T      | T      | T    | T           | T        | T       | C         | T       |
| rs27978460  | 75674006        |      | 1513            |                 | 3'flanking | C/T              |             | T        | T            | T   | T     | T       | T       | T          | C        | T     | T      | T      | T    | T           | T        | T       | C         | T       |
| rs27978461  | 75673995        |      | 1524            |                 | 3'flanking | G/T              |             | T        | T            | T   | T     | T       | T       | T          | G        | T     | T      | T      | T    | T           | T        | G       | T         | T       |
| rs212589942 | 75673978        |      | 1541            |                 | 3'flanking | A/T              |             | A        | A            | A   | A     | A       | A       | A          | T        | A     | A      | A      | A    | A           | A        | A       | T         | A       |
| rs27978462  | 75673968        |      | 1551            |                 | 3'flanking | A/G              |             | A        | A            | A   | A     | A       | A       | A          | G        | A     | A      | A      | A    | A           | A        | A       | A         | A       |
| rs27978463  | 75673849        |      | 1670            |                 | 3'flanking | A/G              |             | A        | A            | A   | A     | A       | A       | A          | G        | A     | A      | A      | A    | A           | A        | A       | A         | A       |
| rs27978464  | 75673846        |      | 1673            |                 | 3'flanking | A/T              |             | T        | T            | T   | T     | T       | T       | T          | A        | T     | T      | T      | T    | T           | T        | A       | A         | T       |
| rs27978465  | 75673640        |      | 1879            |                 | 3'flanking | A/G              |             | G        | G            | G   | G     | G       | G       | G          | A        | G     | G      | G      | G    | G           | G        | G       | G         | G       |
| rs27978466  | 75673591        |      | 1928            |                 | 3'flanking | A/C              |             | C        | C            | C   | C     | C       | C       | C          | C        | C     | C      | C      | C    | C           | C        | A       | C         | C       |
| rs264435069 | 75673581        |      | 1938            |                 | 3'flanking | A/G              |             | G        | G            | G   | G     | G       | G       | G          | G        | G     | G      | G      | G    | G           | G        | G       | A         | G       |
| rs27978467  | 75673572        |      | 1947            |                 | 3'flanking | A/G              |             | G        | G            | G   | G     | G       | G       | G          | A        | G     | G      | G      | G    | G           | G        | G       | G         | G       |
| rs27993468  | 75673571        |      | 1948            |                 | 3'flanking | C/T              |             | C        | C            | C   | C     | C       | C       | C          | C        | C     | C      | C      | C    | C           | C        | C       | T         | C       |
| rs264610028 | 75673539        |      | 1980            |                 | 3'flanking | A/T              |             | A        | A            | A   | A     | A       | A       | A          | A        | A     | A      | A      | A    | A           | A        | A       | T         | A       |

Combined database from MPD and NCBI dbSNP as of 1-18-2013.

Sequence location reference: Mus musculus strain C57BL/6J chromosome 2, GRcm38.p1 C57BL/6J, NCBI Reference Sequence: NM\_010902.3.

\*Error in dbSNP fixed.
